# Supplementary material
Source: Research Square preprint supplement (doi:10.21203/rs.3.rs-9929423/v1)

**Figure.1**

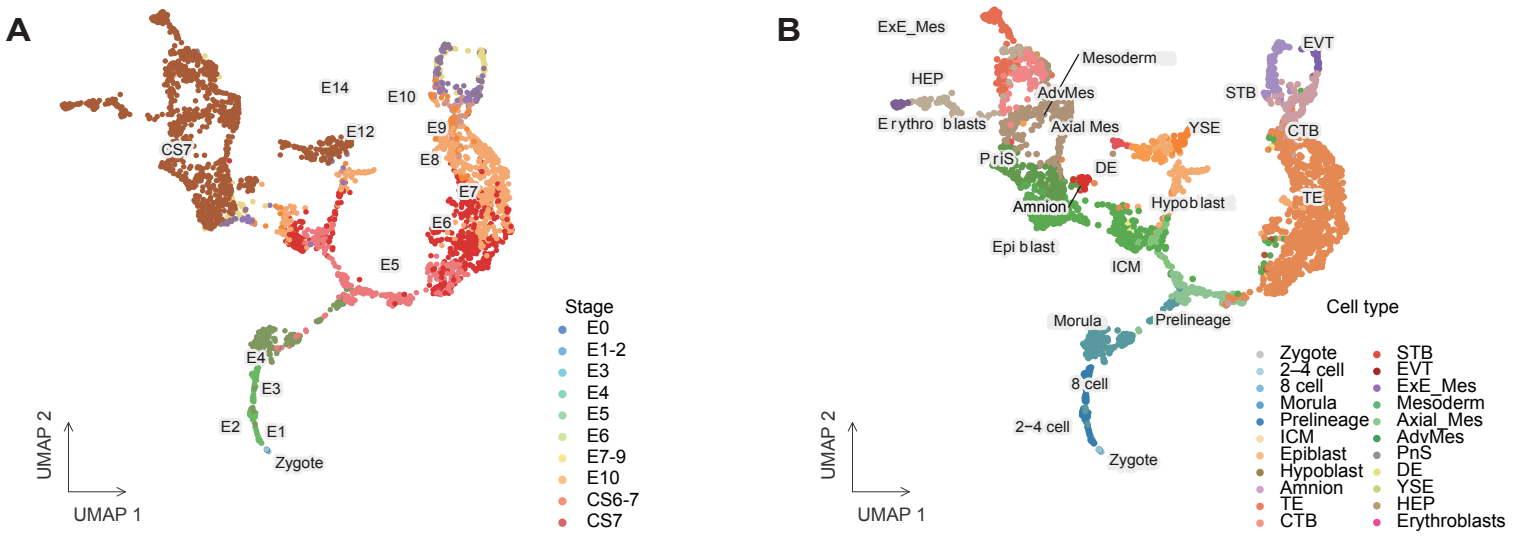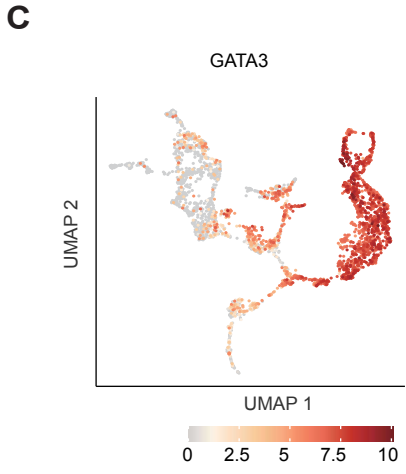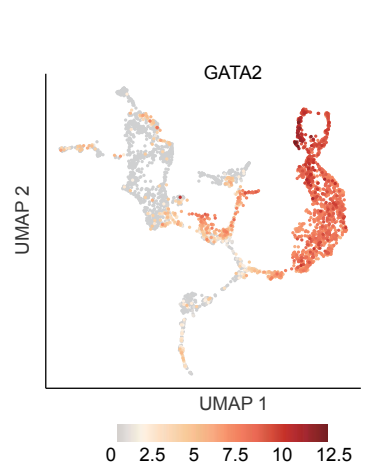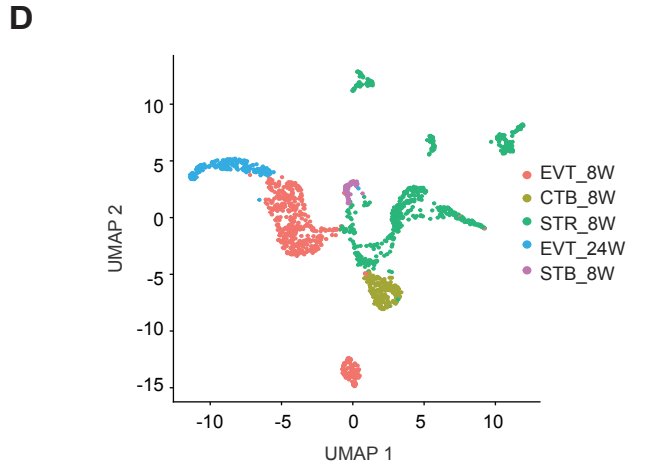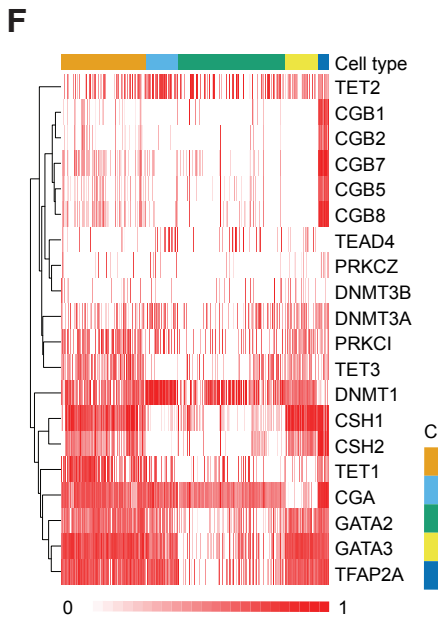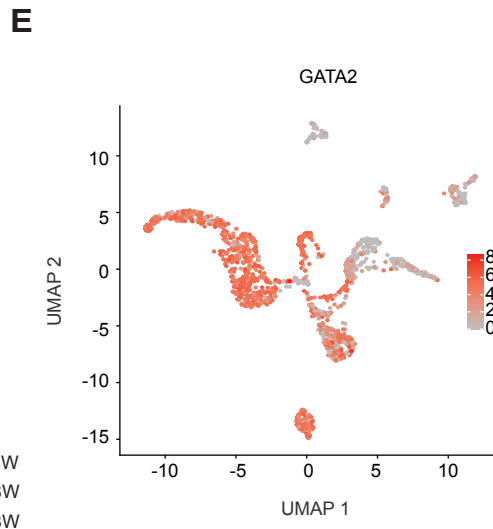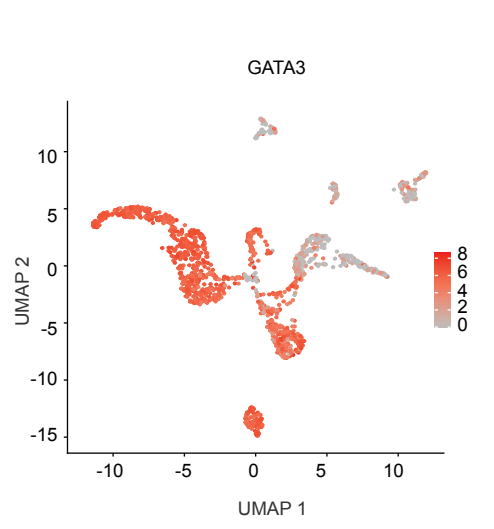

**Figure.2**

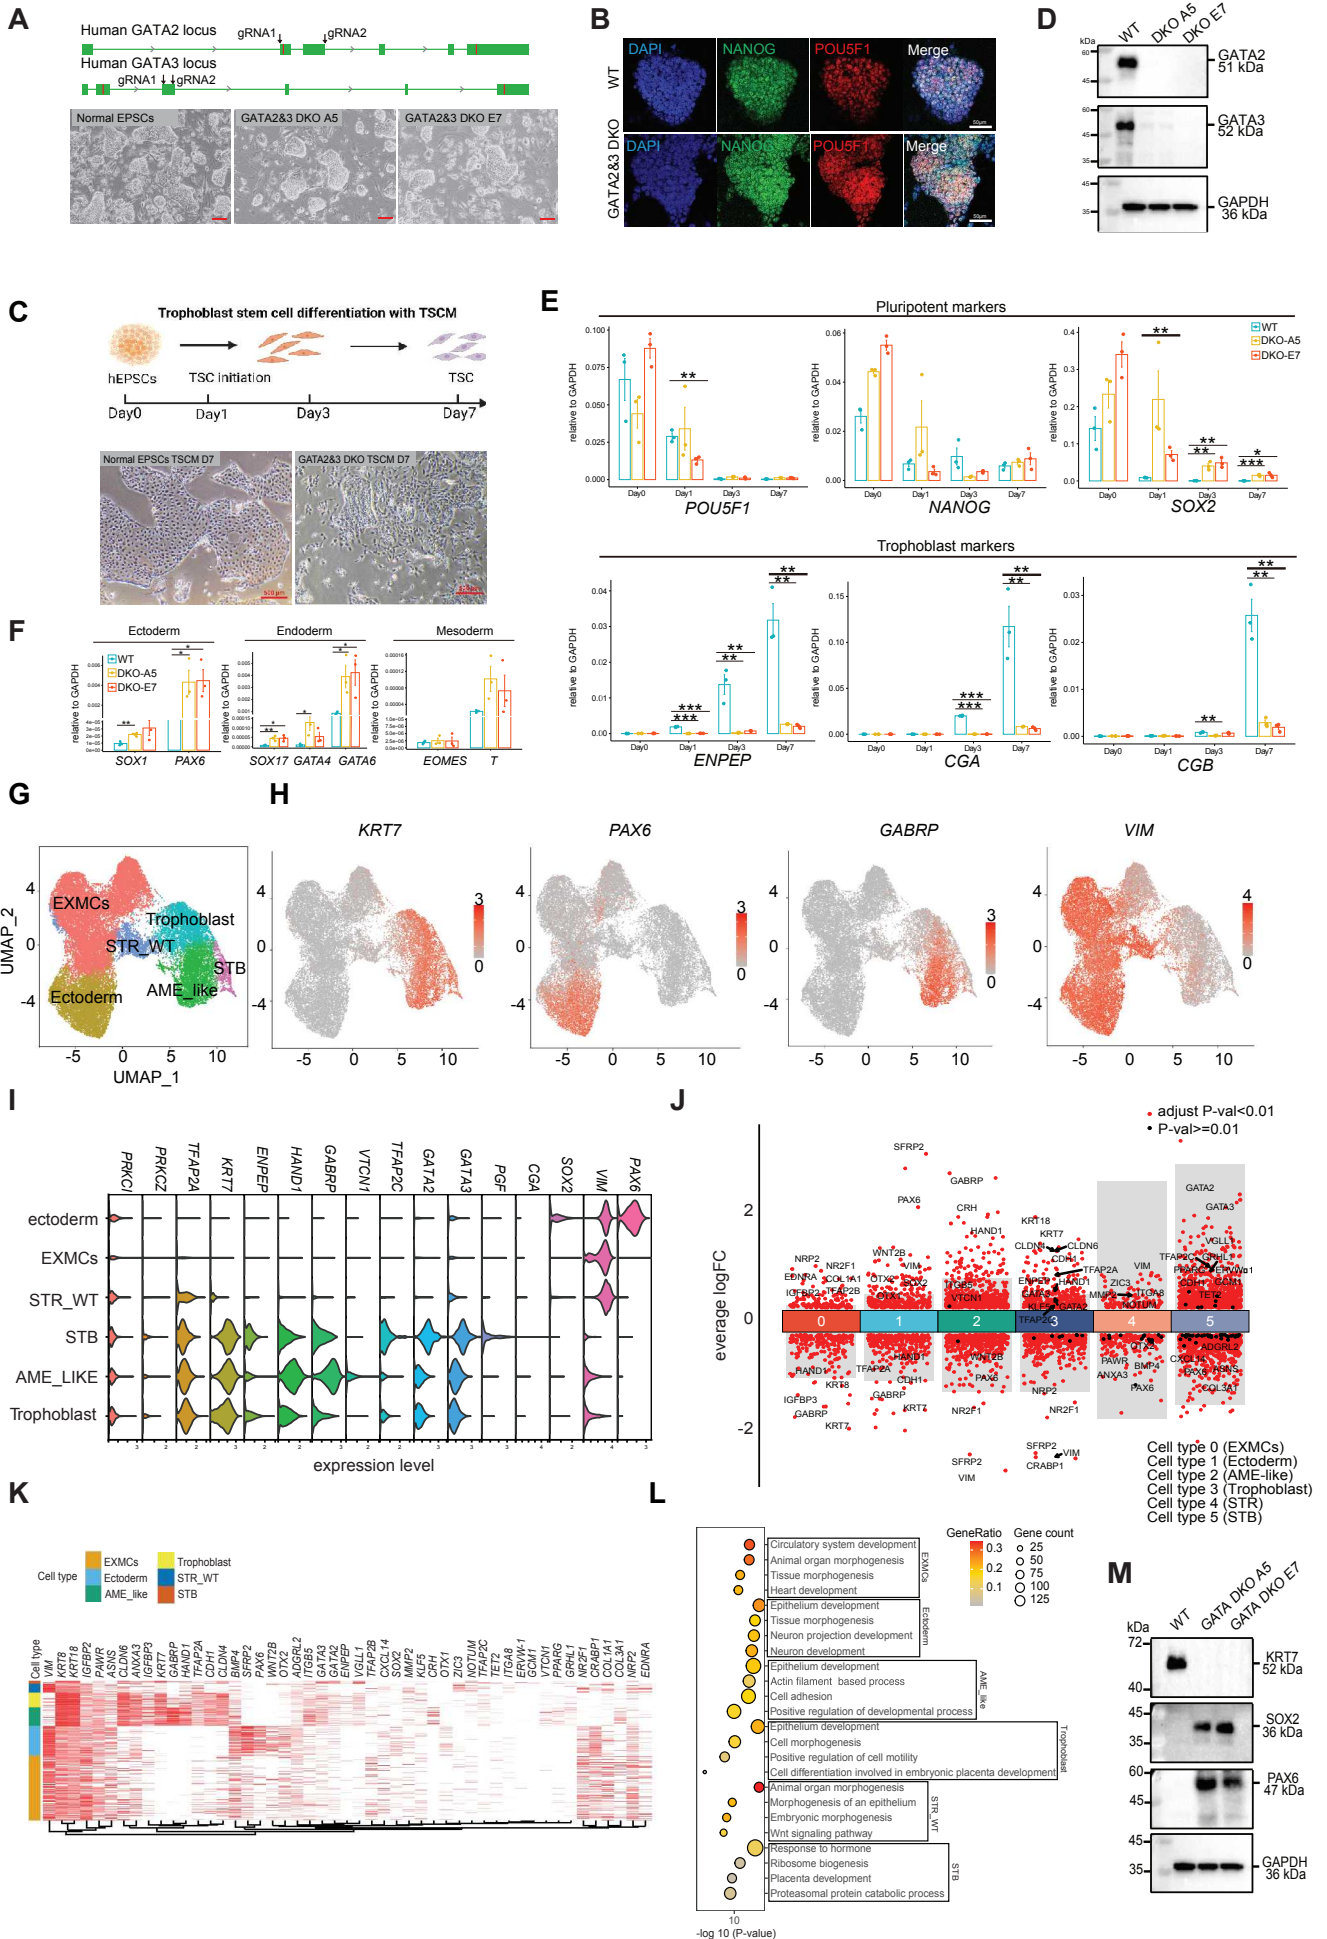

**Figure.3**

**A**

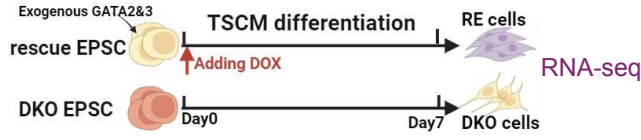

**B**

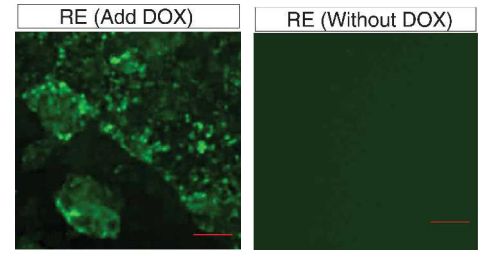

**C**

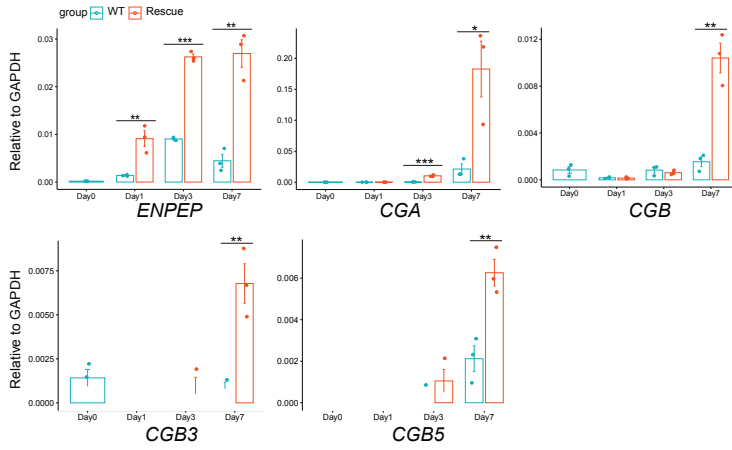

**D**

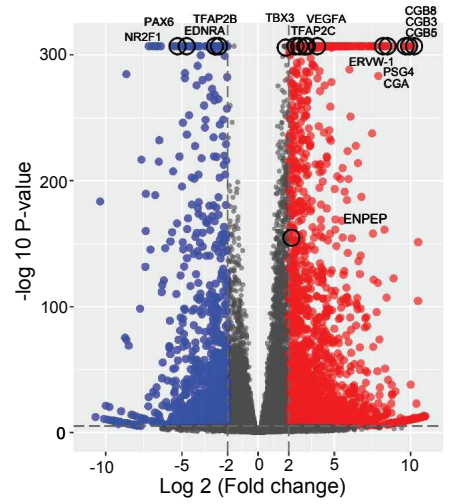

**E**

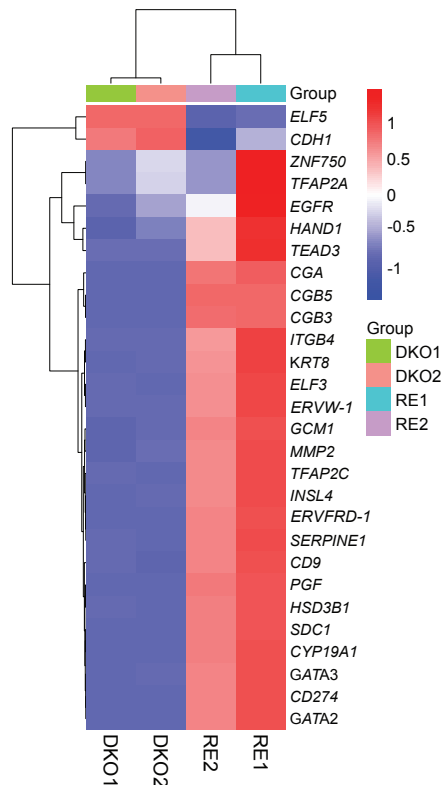

**F**

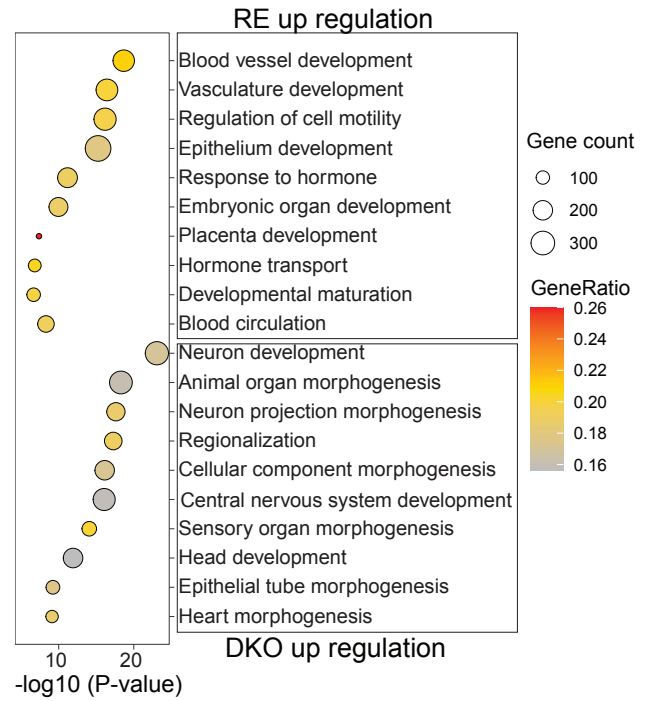

**G**

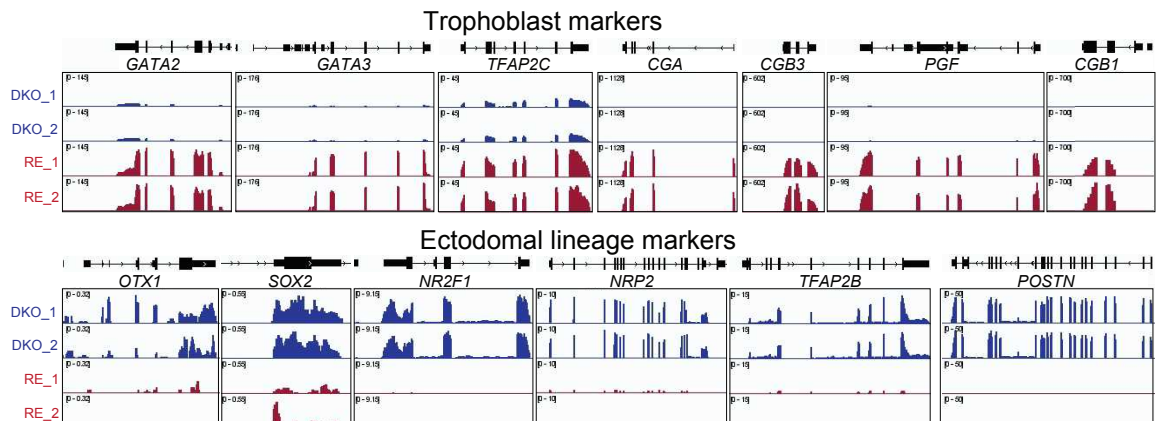

**Figure.4**

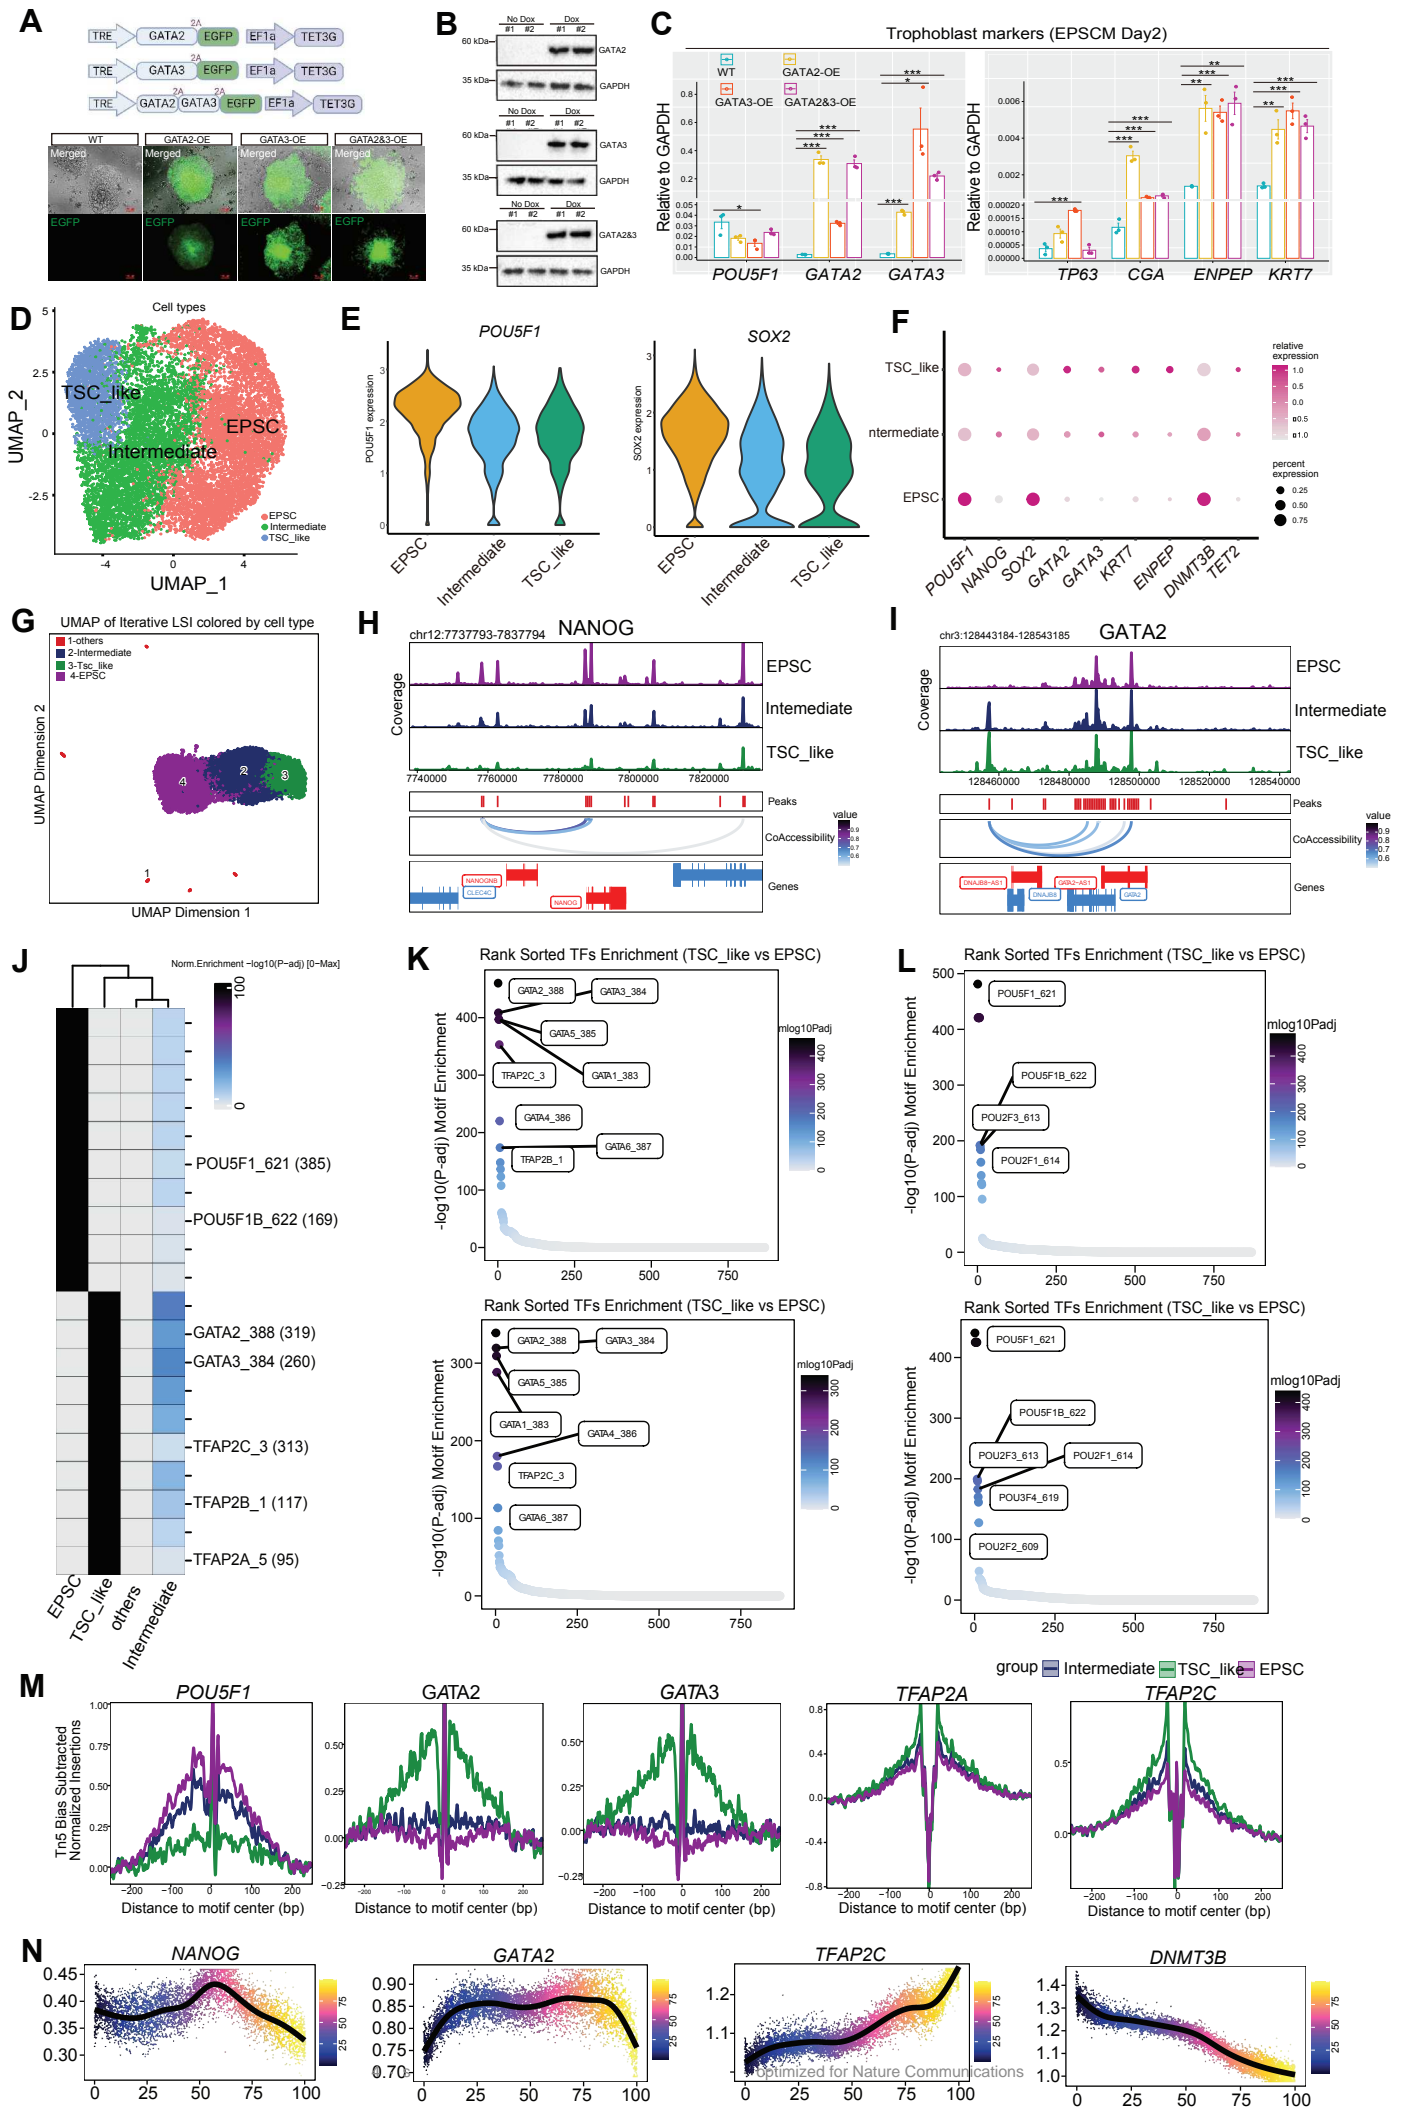

**Figure.5**

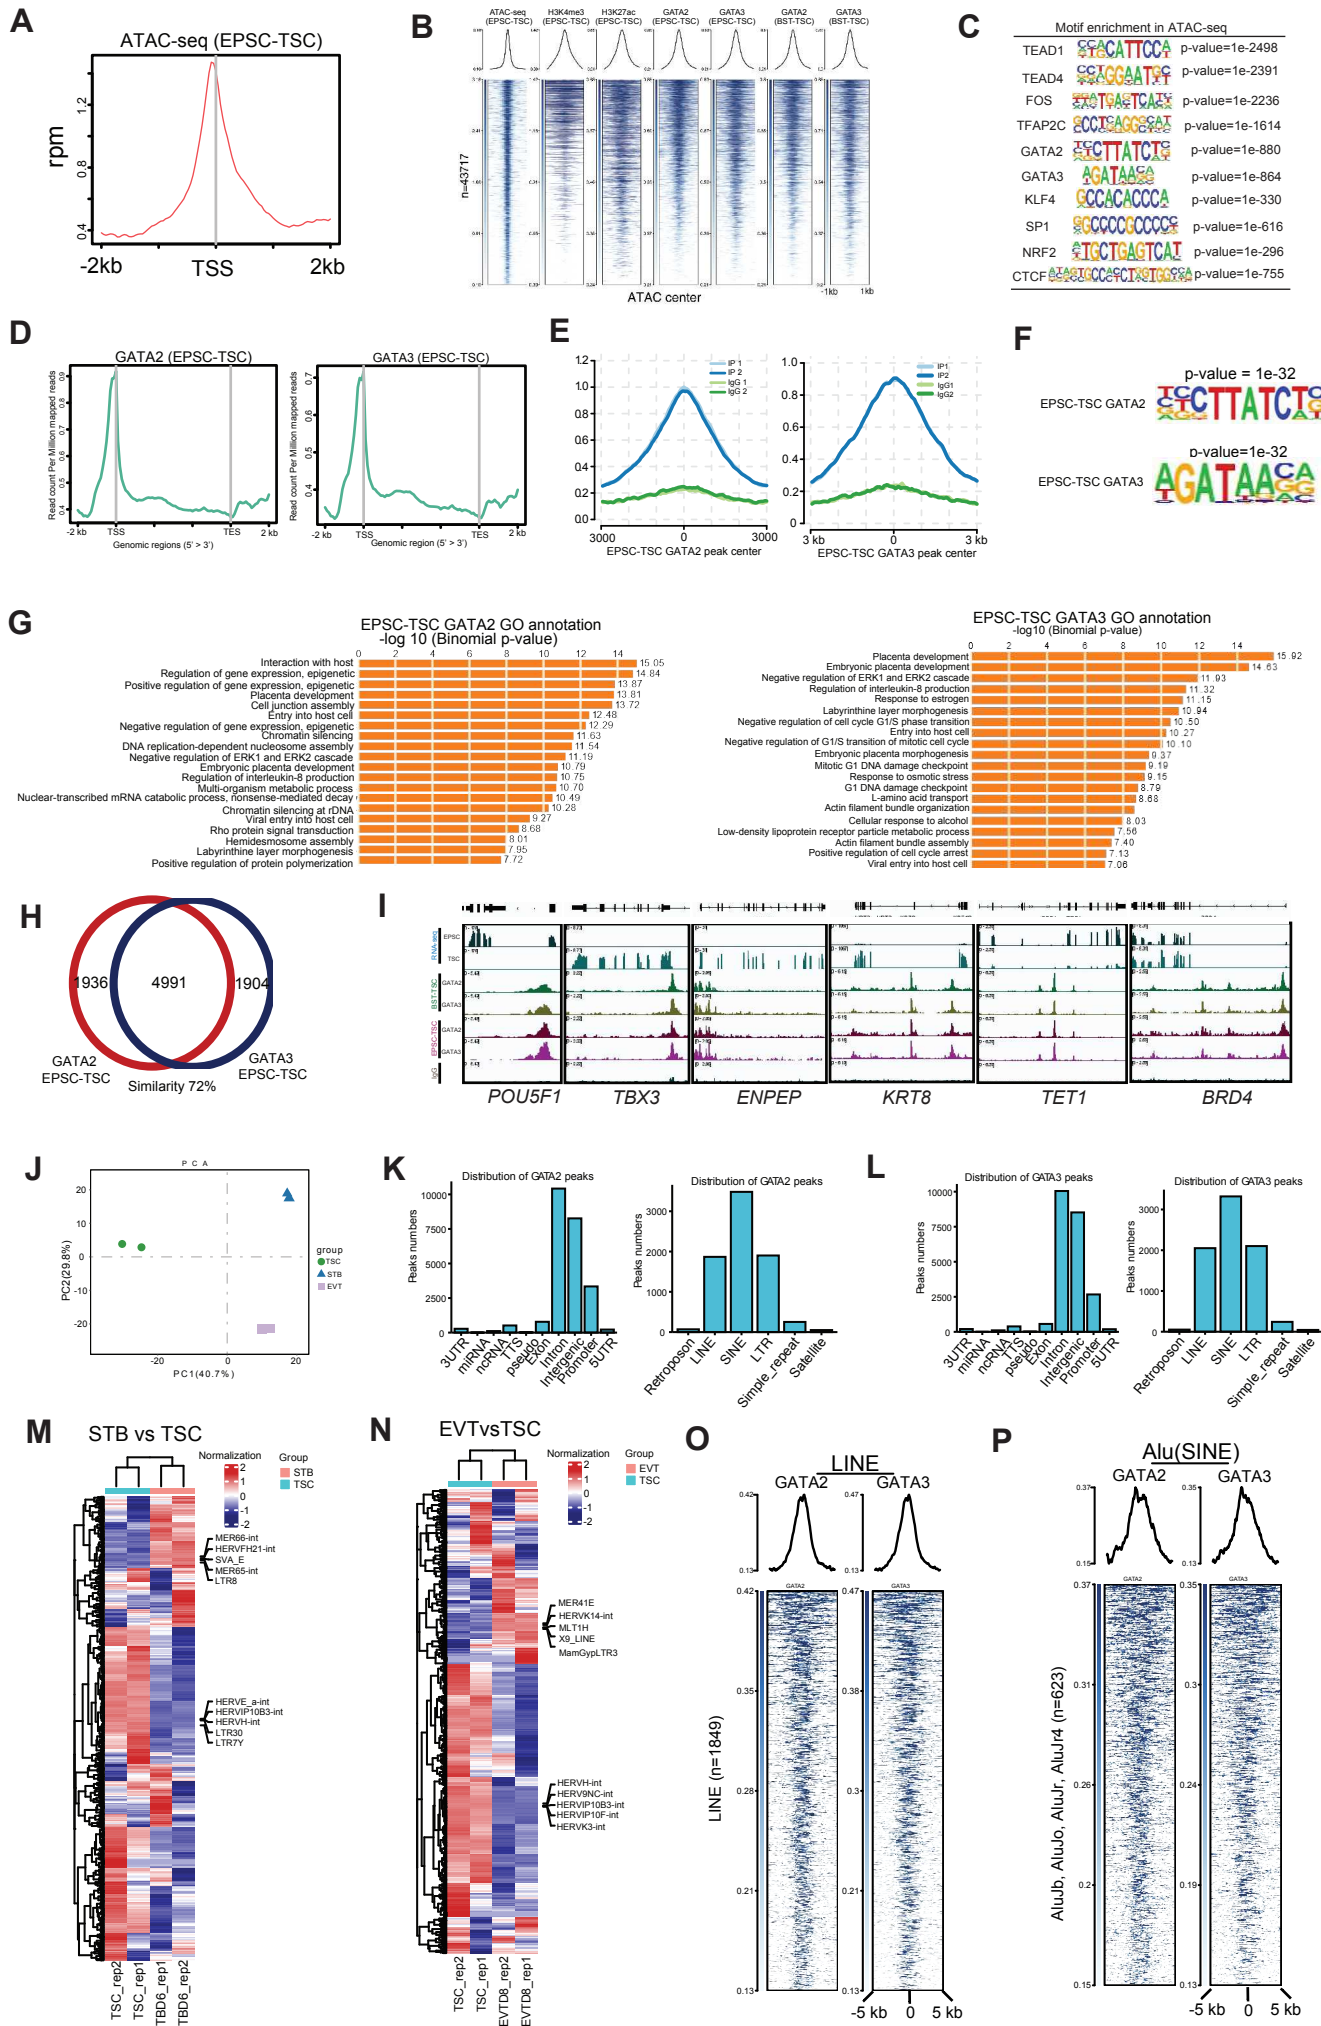

**Figure.6**

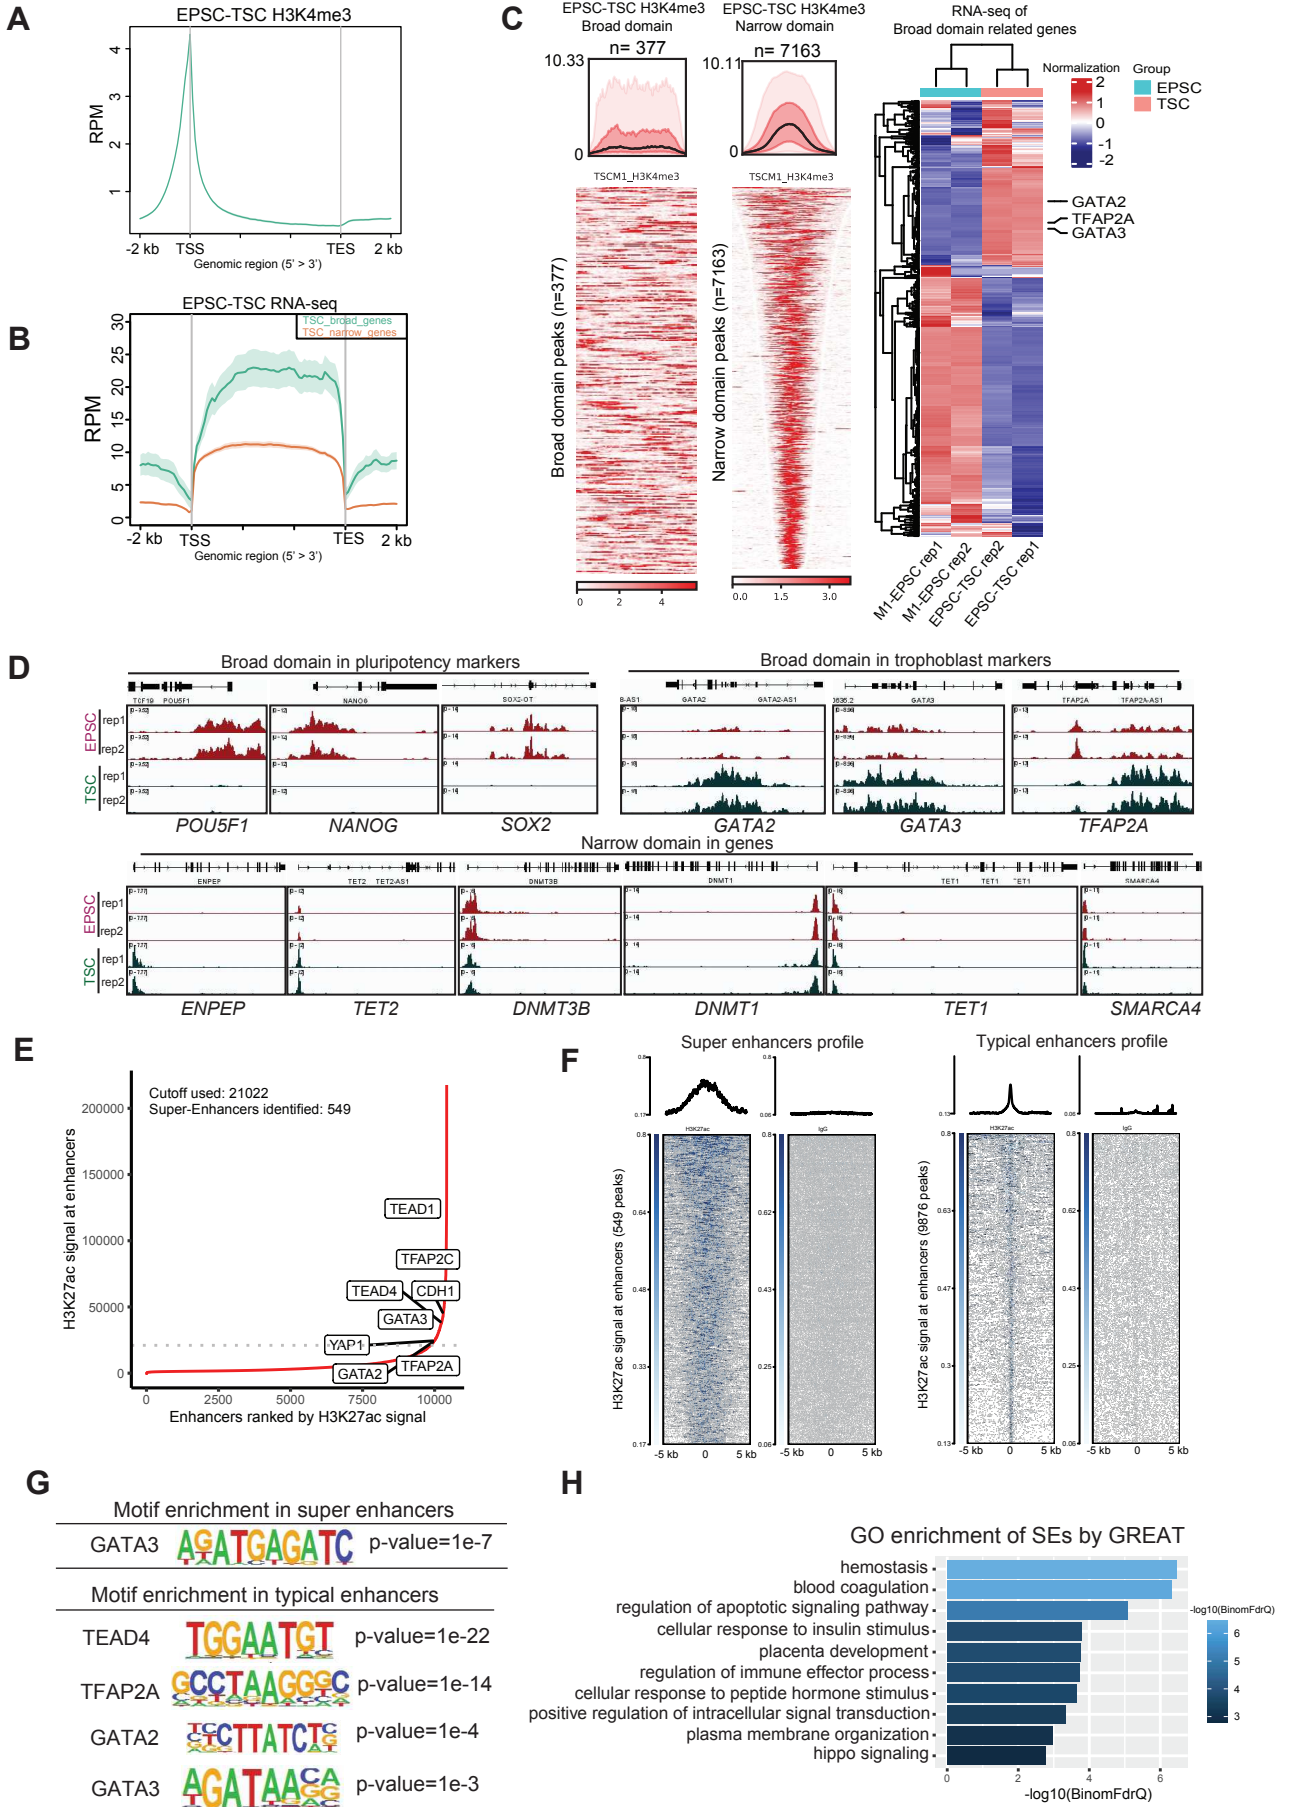

**Figure.7**

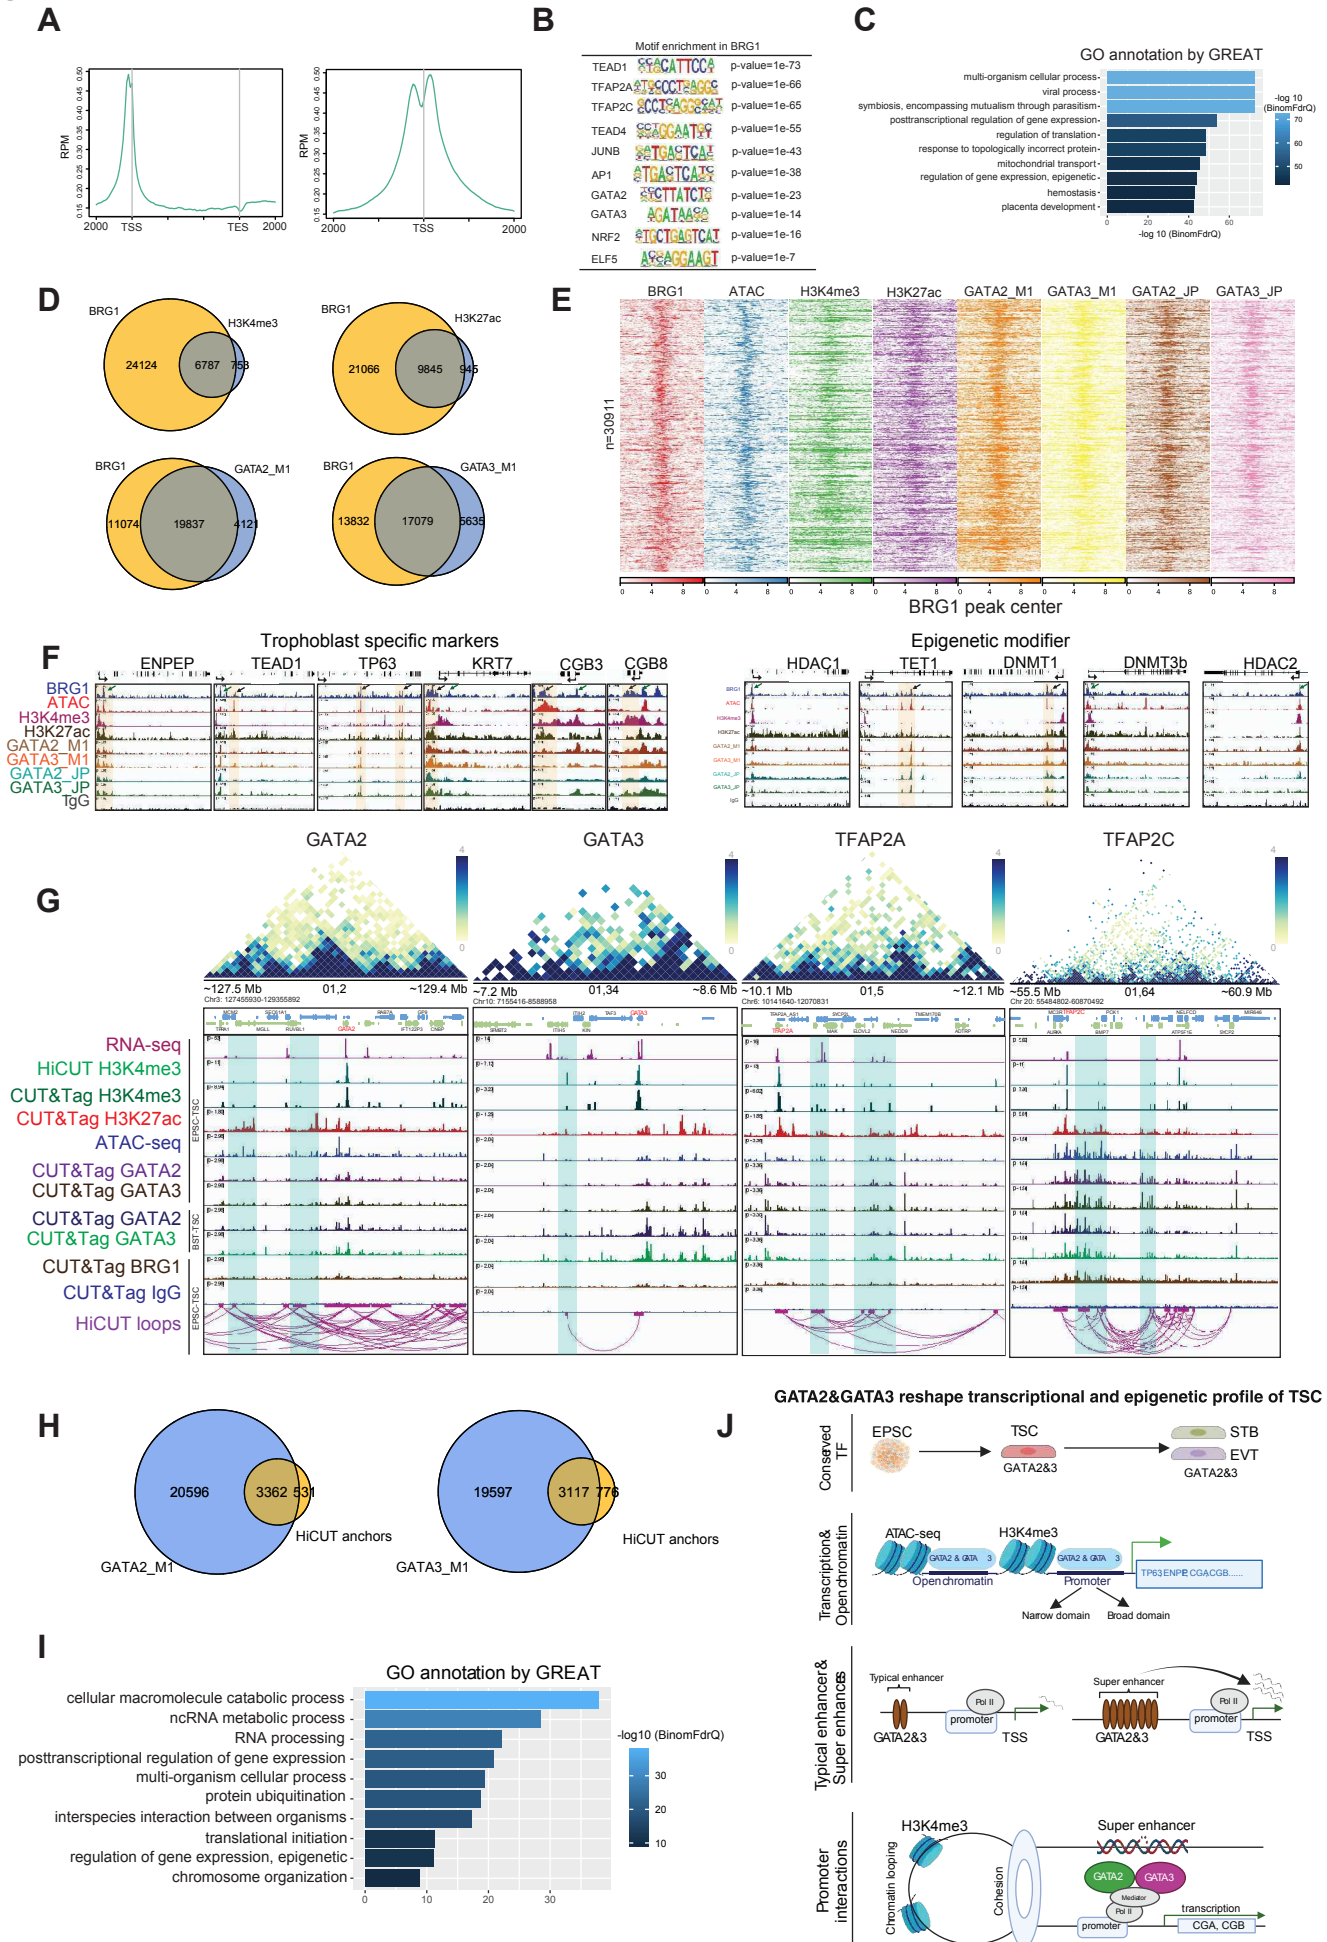

Figure.S1

A

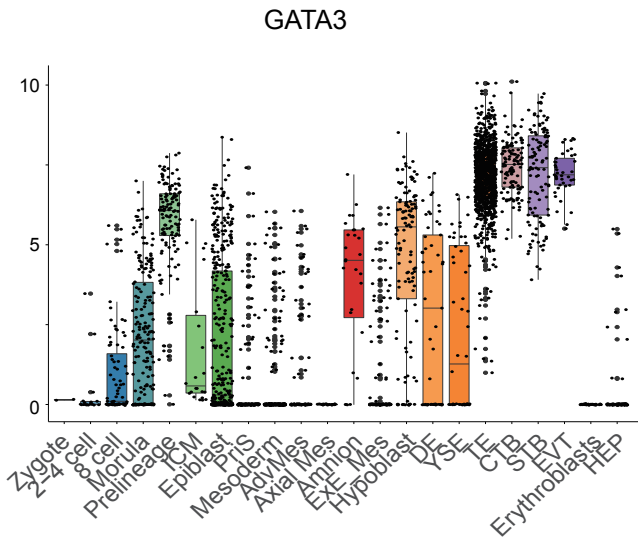

GATA2

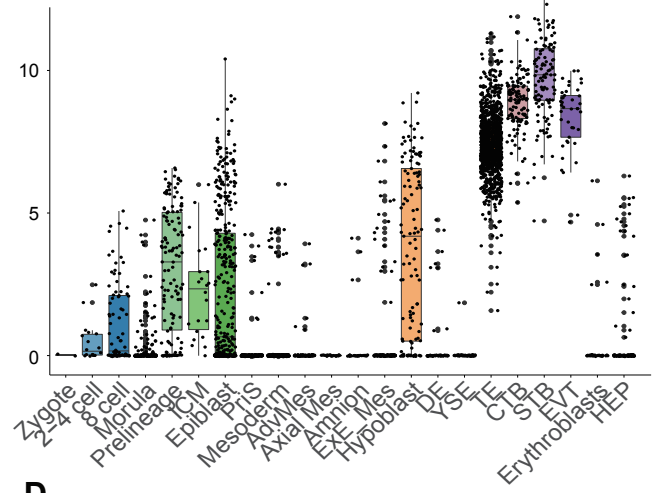

B

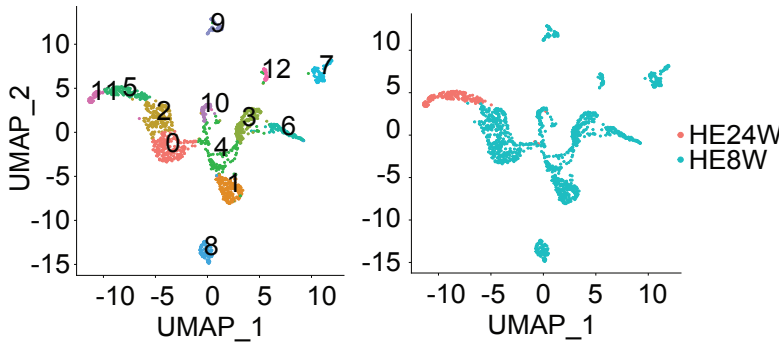

D

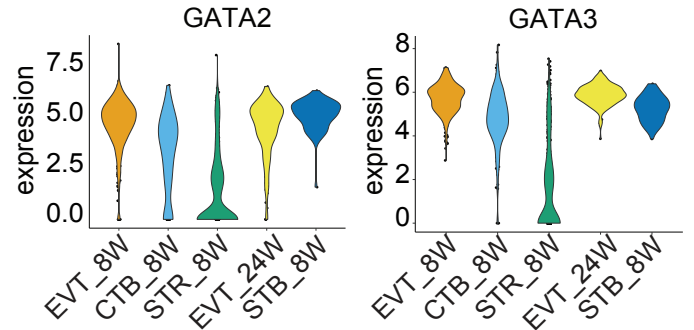

C

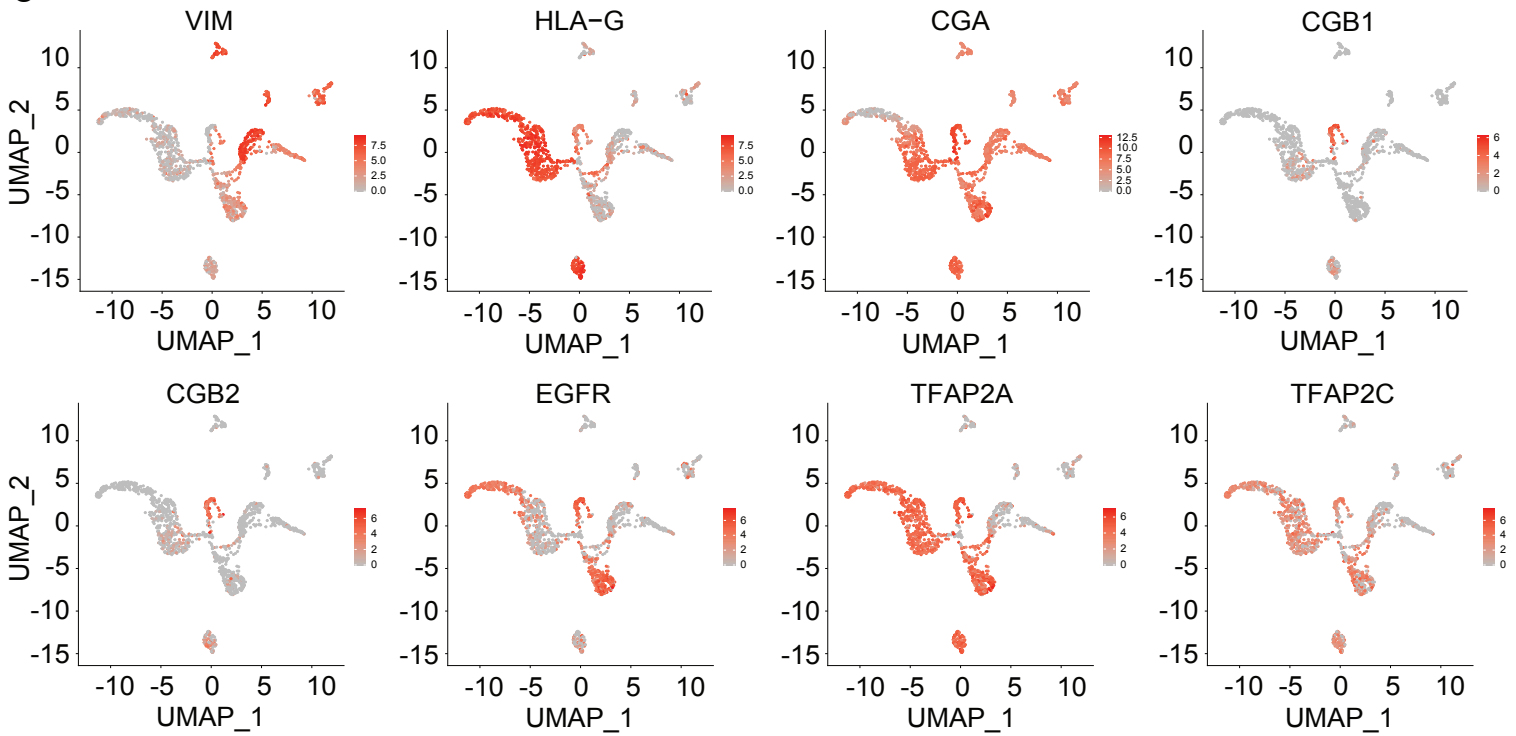

**Figure.S2**

**A**

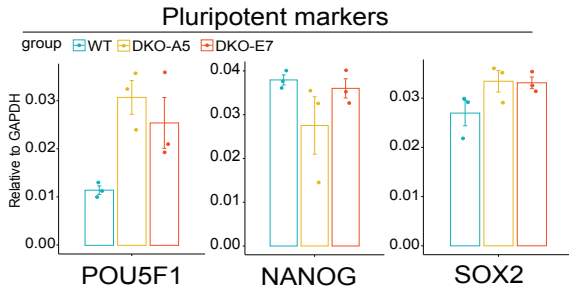

**B**

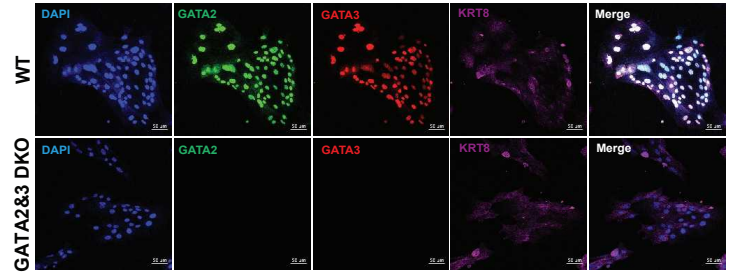

**C**

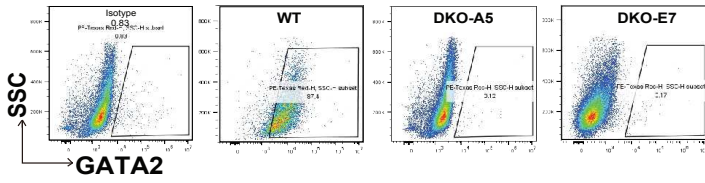

**D**

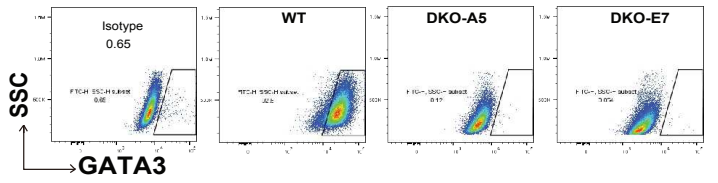

**E**

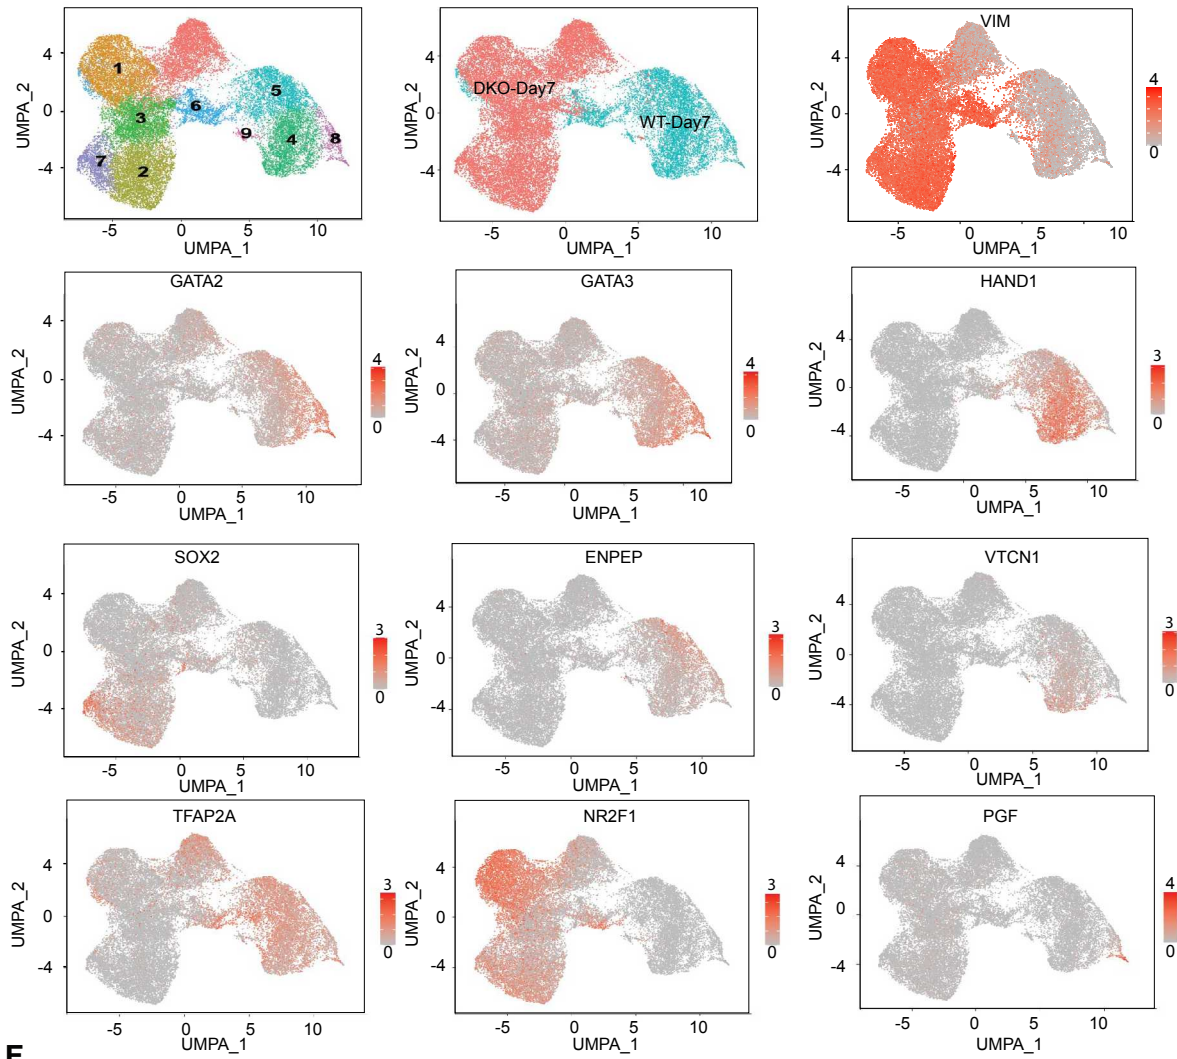

**F**

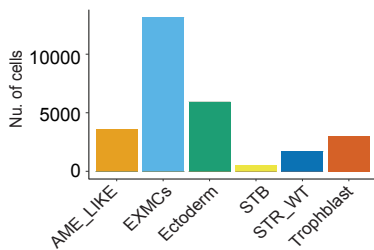

**Figure.S3**

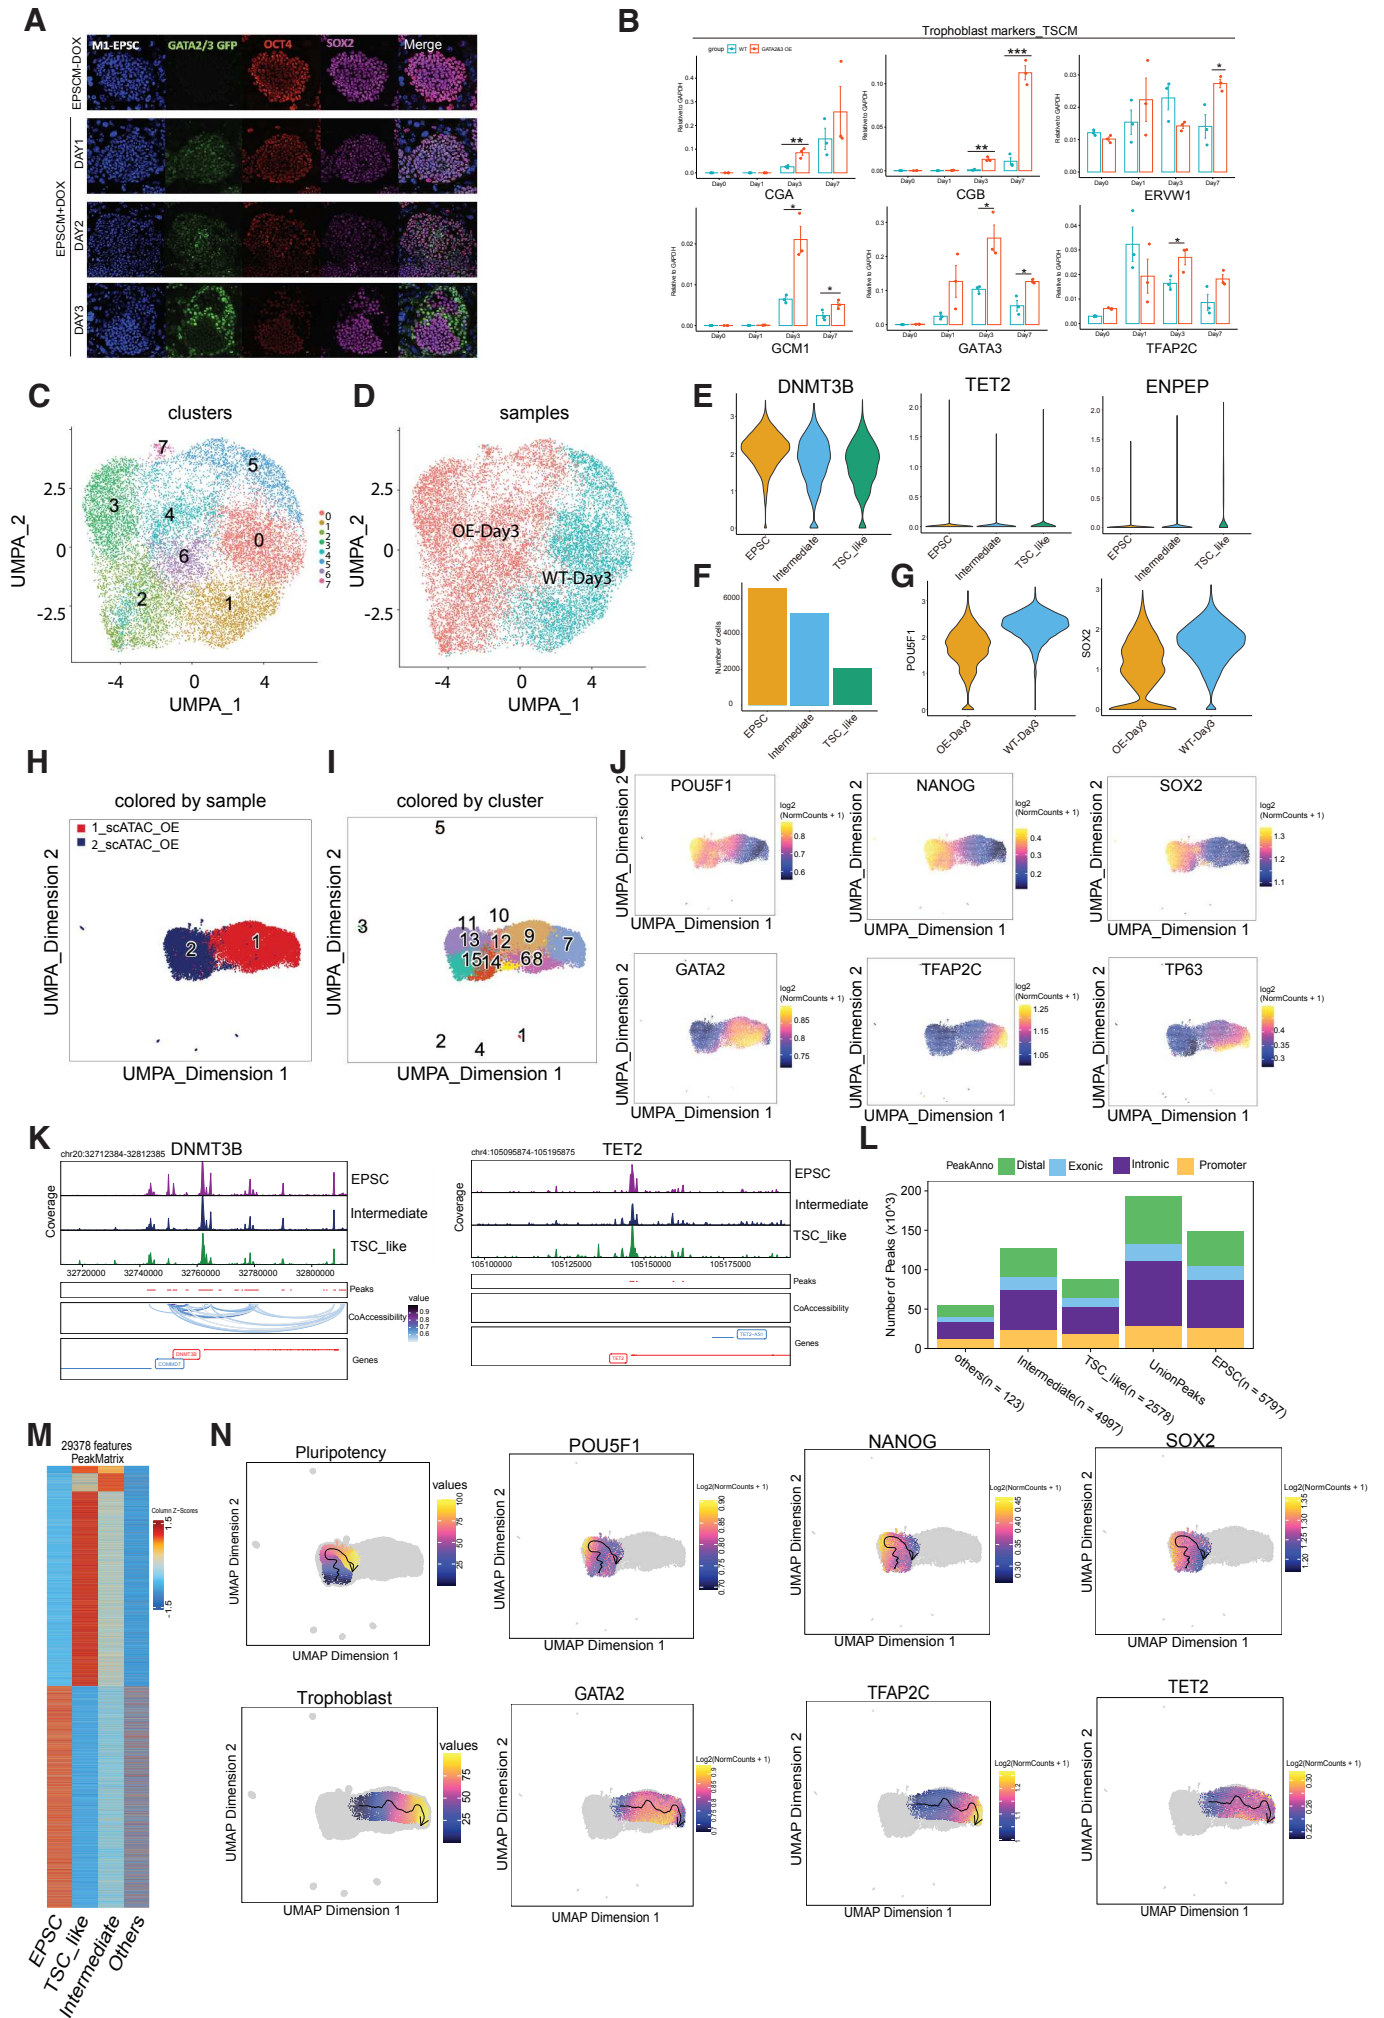

**Figure.S4**

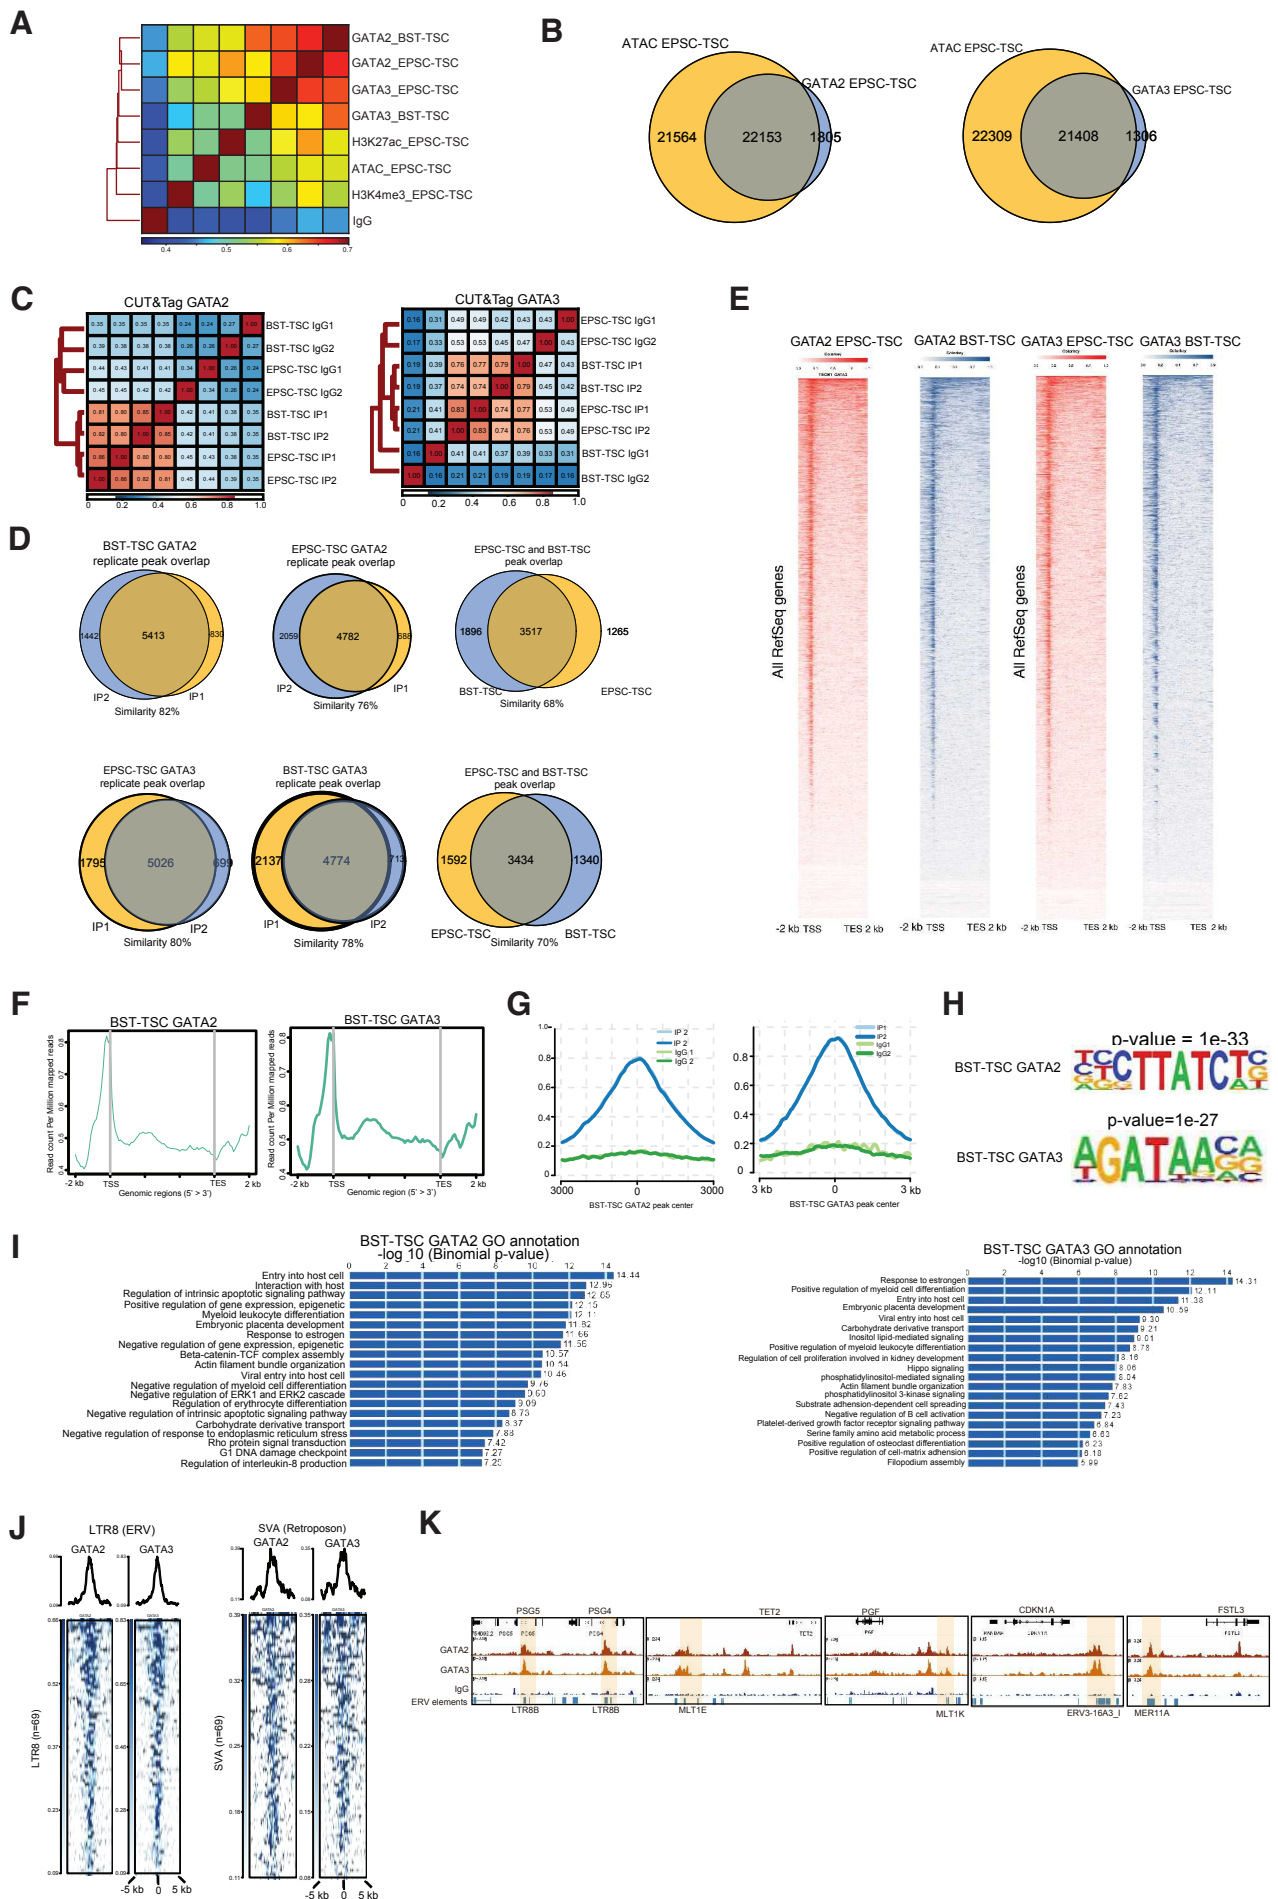

**Figure.S5**

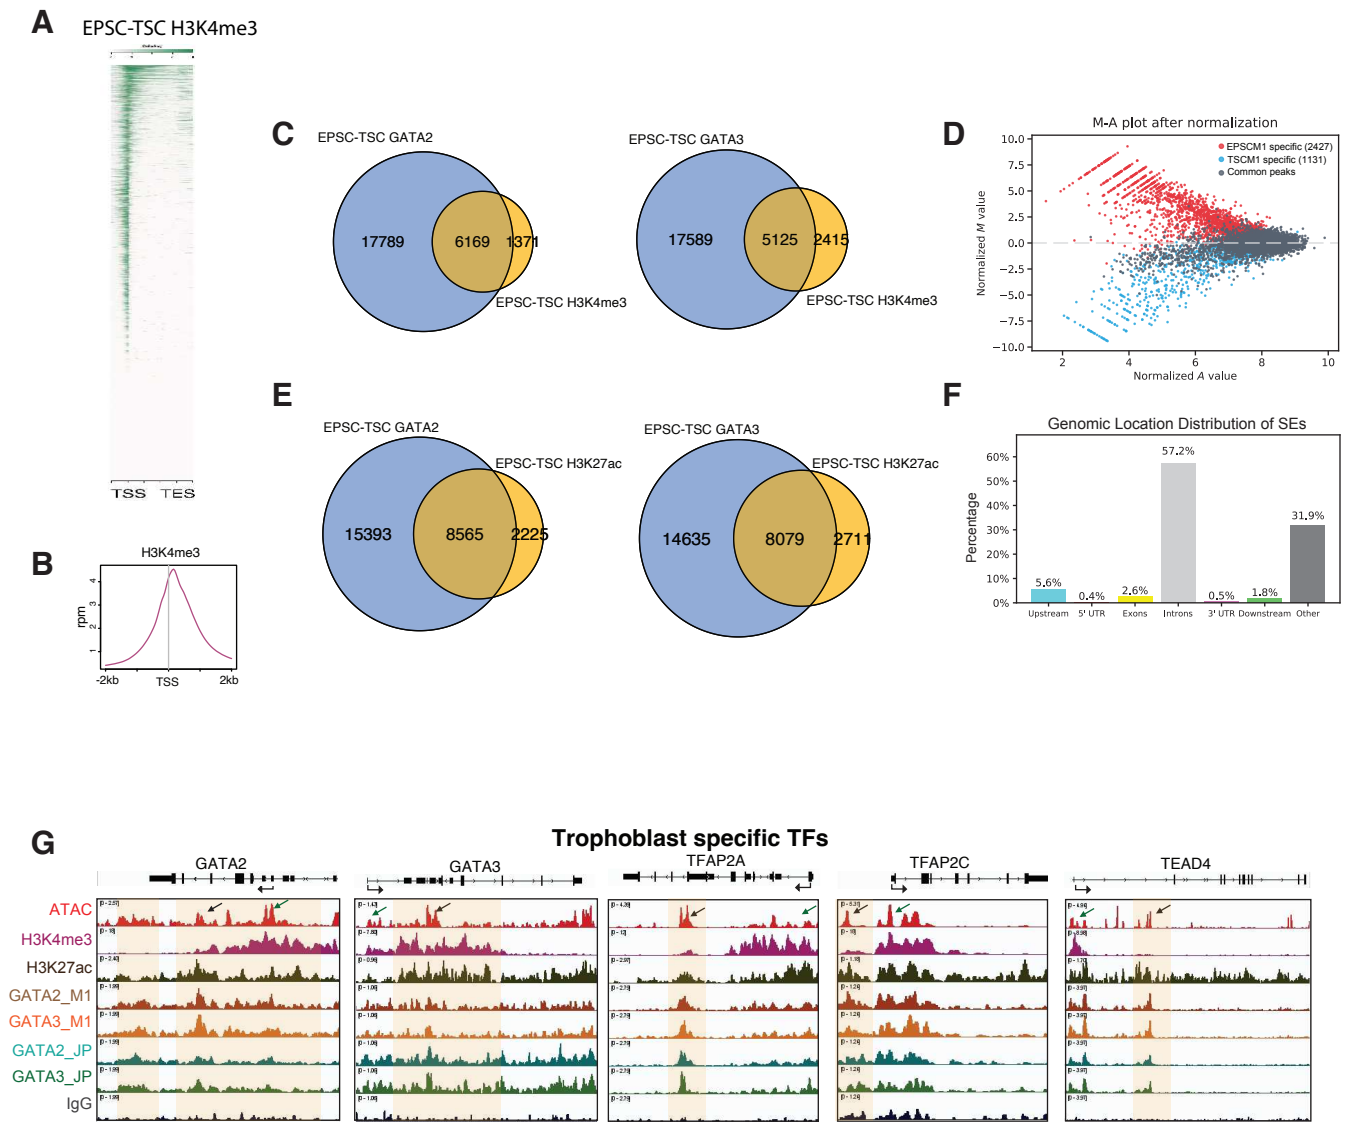

**Figure.S6**

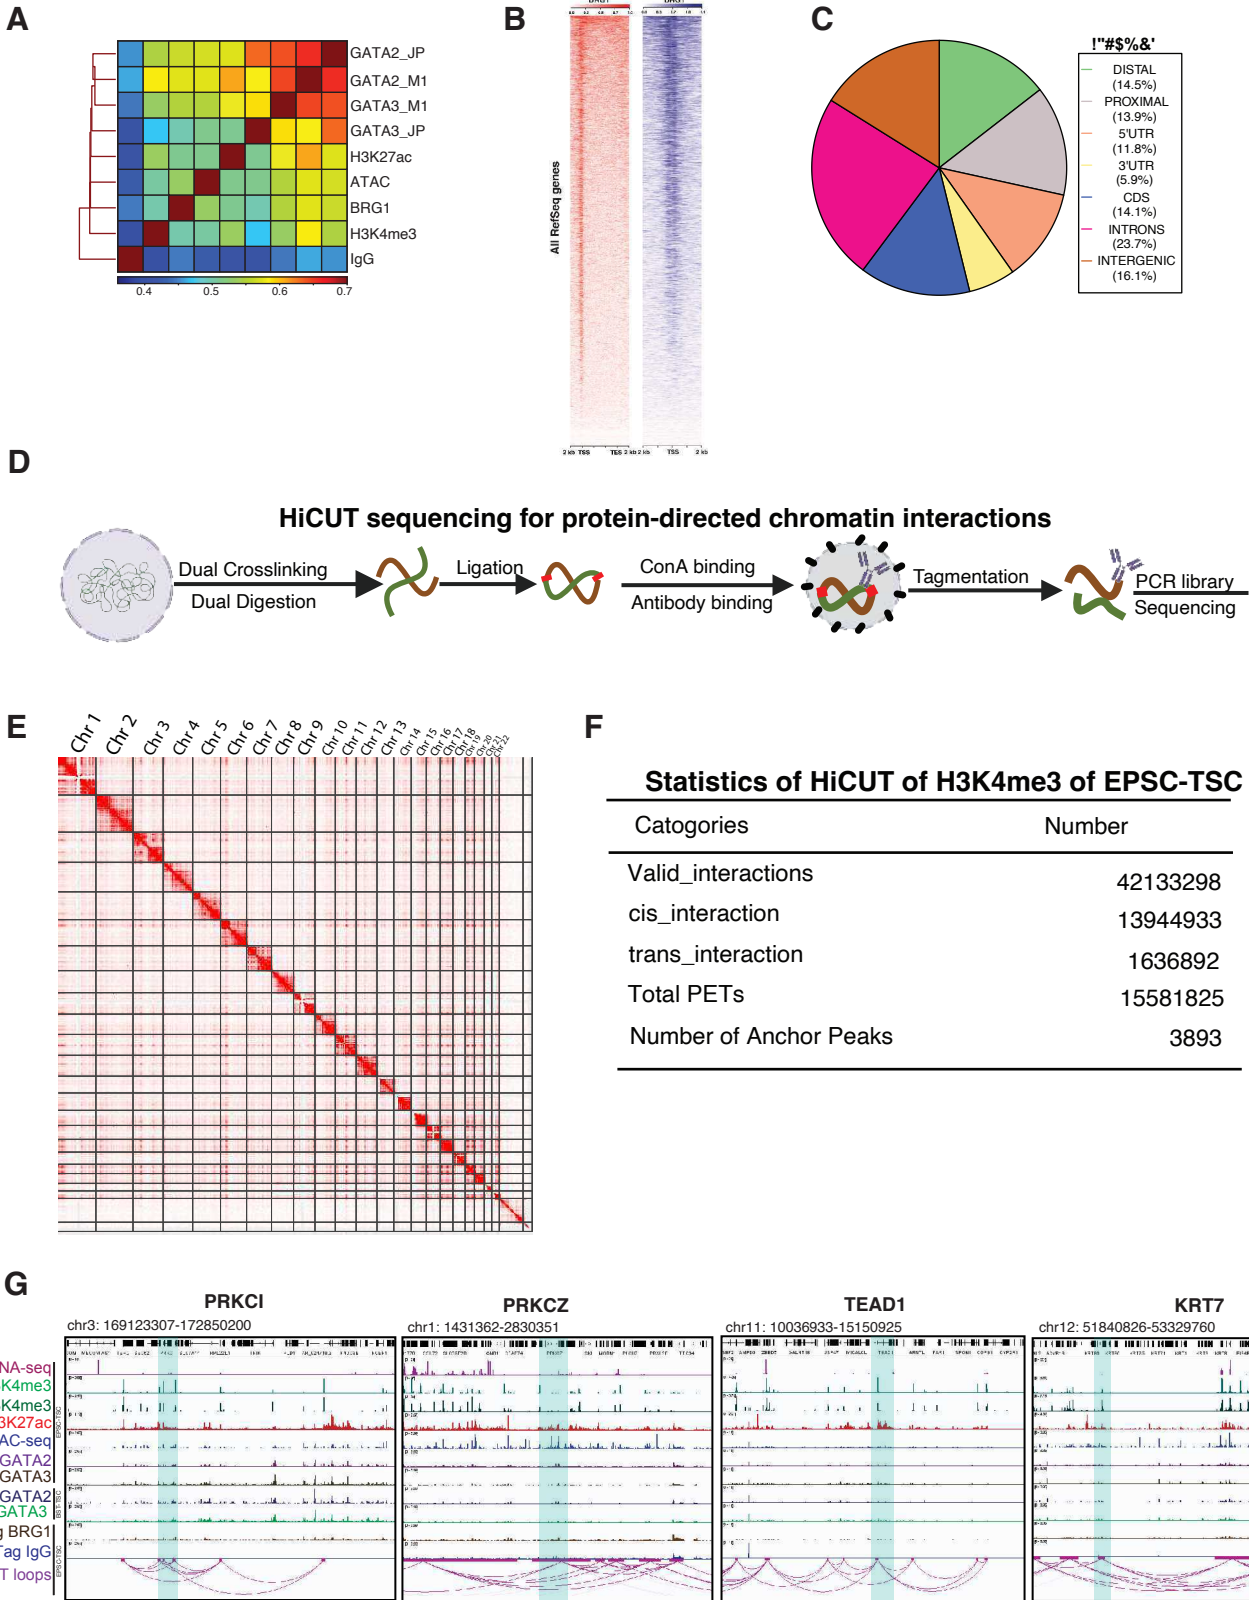

Supplement: Supplementary file 2 [file 1d7e82ed4b22554239927aae.pdf]
