# Supplementary material
Source: Research Square preprint supplement (doi:10.21203/rs.3.rs-9929423/v1)
Supplement: Supplementary file 1 [file 094bf7619b7927266d653e5a.docx]

**Figure S1: *GATA2* and *GATA3* expression in scRNA-seq of human embryo and placenta**

1. Bar plot showing the expression of GATA2 and GATA3 from human embryogenesis transcriptome by the assigned cell types.
2. Left: UMAP distribution of single cells from 13 cell clusters. Right: UMAP distribution of single cells from the sample meta information, including 8 and 24 weeks.
3. Feature plot showing the expression of the canonical markers of EVTs, STBs, STR, and CTBs in the human placenta.
4. Violin plot showing the expression levels of GATA2 and GATA3 in the human placenta.

**Figure S2: Transcriptomic characterization of the requirement for GATA2 and GATA3 in trophoblast differentiation from hEPSCs**

1. RT-qPCR analysis of the expression of pluripotent genes (POU5F1, NANOG, and SOX2) in WT and GATA2&3 DKO cells in EPSCM culture.
2. Immunofluorescence analyses for GATA2, GATA3, and KRT8 in normal and GATA2&3 DKO cells during TSCM differentiation on day 7. DAPI: nuclear staining; Scale bars, 50 µm.
3. Fluorescence-activated cell sorting (FACS) analysis of the percentage of GATA2 positive cells during TSCM differentiation. Isotype was used as the negative control.
4. Fluorescence-activated cell sorting (FACS) analysis of the percentage of GATA3 positive cells during TSCM differentiation. Isotype was used as the negative control.
5. UMAP of the cell clusters and sample information of trophoblast differentiated on day 7 with WT and GATA-DKO groups.
6. Bar plot showing the percentage and absolute cell numbers of each cell type.
7. Feature plot of the expression of cell-type specific markers in each cell type of the WT and GATA-DKO groups.

**Figure S3: Re-introduction of GATA2 and GATA3 restores trophoblast defects in DKO cells**

1. RT-qPCR analysis of the expression of AME-like markers in hEPSCs on Day 2. WT: normal hEPSCM culture; GATA2_OE: inducible over-expression of GATA2; GATA3_OE: inducible over-expression of GATA3; GATA2&3_OE: inducible over-expression both of GATA2 and GATA3. Inducible over-expression was performed with doxycycline (1000ng/ml).
2. Immunofluorescence analyses of pluripotent markers (POU5F1 and NANOG) on days 1, 2 and 3 with and without DOX treatment. Scale bars, 100 µm.
3. RT-qPCR analysis of the expression of trophoblast markers at TSCM on days 0, 1, 3 and 7. WT: group with normal hEPSCM culture; GATA2&3 OE: group with inducible over-expression of GATA2 and GATA3 with DOX (1000ng/ml). Data are shown as mean ± SD; n=3 independent replicates.
4. UMAP of the cell clusters of WT and GATA-OE (adding DOX for three days). Each dot represents one cell, and colours represent each cell cluster as indicated.
5. UMAP visualization of the cells based on sample meta-information.
6. Violin plot of the expression of markers in each cell type.
7. UMAP visualization of the scATAC-seq dataset with 13,495 cells, coloured by samples. Each dot represents one cell. WT: normal hEPSCs cultured. GATA2&3 OE: hESPCs cultured with DOX (1ug/ml) for three days.
8. UMAP visualization of the scATAC-seq data, coloured by clusters.
9. Heatmap showing the accessible degrees of typical markers expressed in the WT and GATA2&3 OE group. Pluripotency-related markers consisted of POU5F1, NANOG, and SOX2. Trophoblast-related markers consisted of GATA2, TFAP2C, and TP63.
10. UCSC genome browser tracks showing the open chromatin signals of DNMT3B and TET2.
11. Bar graphs showing the distribution of peaks on genomic features.
12. Heatmap of the marker peaks in each cell type.
13. Trajectory analysis of two cell lineages of pluripotency and trophoblast. WT group was assigned as cell lineage of pluripotency (top). GATA2&3 OE group was assigned as cell lineage of trophoblast (bottom).
14. IGV snapshot showing the signals of trophoblast and AME-like genes.

**Figure S4: Inducible overexpression of *GATA2* and *GATA3* in EPSCM culture**

1. Heatmap showing the Spearman correlation results of multiple datasets.
2. Venn diagram showing the overlap between the results of ATAC-seq and CUT&Tag of GATA2 (left) or CUT&Tag of GATA3 (right).
3. Spearman correlation of the CUT&Tag results of GATA2 and GATA3. Two independent cell lines including BST-TSCs and EPSC-TSCs were incorporated. Each cell line consists of two replicates.
4. Venn diagram showing the overlap of peaks of GATA2 and GATA3 within each replicate and between different cell lines.
5. Heatmap showing the read density at the genomic regions of all reference genes. Two independent cell lines were included. TSS, transcription start site; TES, transcription end site. Regions from 2000 bps up of TSS to 2000 bps down of TES were plotted.
6. Metagene analysis of the GATA2 and GATA3 CUT&Tag reads across the reference genes. Signals from 2000 bps upstream of TSS to 2000 bps downstream of TES are shown. Experiments were performed using BST-TSC.
7. Metaplot representing the positions of GATA2 and GATA3 relative to the summit of the peak centre. Experiments were performed by BST-TSC.
8. Motif analysis by HOMER showing the significantly enriched DNA-binding motifs of the GATA2- and GATA3-motifs. Experiments were performed using BST-TSC.
9. Enriched GO terms of peaks called from the GATA2 and GATA3 CUT&Tag results by GREAT. Normalized binomial p-value was plotted. Experiments were performed using BST-TSC.
10. Heatmap showing the GATA family-controlled TEs. Peaks annotation was performed using HOMER and plotted using trackplot in R. Subcategories of ERV, and retroposon were included. Signals from 5000 bps upstream of the peak centre to 5000 bps downstream of the peak centre are shown.
11. IGV snapshot showing the tracks of markers of the GATA family-controlled TEs.

**Figure S5: GATA2&3 occupied by the broad domain of H3K4me3 and orchestrated super-enhancers in regulating transcriptions in hTSC**

1. Heatmap showing the read densities at the genomic regions of all reference genes. CUT&Tag of H3K4me3 of EPSC-TSC were plotted. TSS and TES were labelled.
2. Metagene analysis mapping the integrated signal density of H3K4me3 CUT&Tag reads relative to the TSS (±2 kb) in hTSCs.
3. Venn diagram showing the overlap of peaks. Left, the overlap result between CUT&Tag results of GATA2 and CUT&Tag results of H3K4me3 of EPSC-TSC. Right, the overlap result between CUT&Tag results of GATA3 and CUT&Tag results of H3K4me3 of EPSC-TSC.
4. Volcano plot (MAnorm analysis) highlighting differential H3K4me3 peaks between EPSCM1 (red) and TSCM1 (blue) populations.
5. Venn diagram showing the overlap between the CUT&Tag results of GATA2 and the CUT&Tag results of H3K27ac (left). The overlap between the CUT&Tag results of GATA3 and the CUT&Tag results of H3K27ac (right).
6. SEs’ distribution of H3K27ac at the genomic regions. The Y-axis represents the percentage of each category. The X-axis represents the category of genomic regions.
7. IGV snapshot showing the tracks of specific trophoblast TFs. Shadow highlighted the regions of super-enhancers. The green arrow indicated the promoter regions and the purple arrow indicated the super enhancer regions.

**Figure S6: GATA2 and GATA3 share binding with BRG1 and coincide with H3K4me3-anchored promoter–enhancer contacts in hTSCs**

1. Heatmap showing the Spearman correlation results of multiple datasets.
2. Heatmap showing the read densities across the TSS site of reference genes with combined datasets. 2000 bps around the TSS site were plotted.
3. Distribution of the CUT&Tag results of BRG1 of EPSC-TSCs on genomic regions.
4. Illustration of the library preparation for the HiCUT experiment.
5. Heatmap showing a matrix of global promoter interactions analyzed by juicer.
6. Statistic of HiCUT mapping results by HiC-Pro.
7. IGV snapshot showing the tracks, anchors and loops of specific trophoblast markers.

**Table S1: Key resources table of antibodies used in this study**

| **No.** | **Target** | **Supplier** | **Cat. No.** | **Dilution** | **Host** | **Usage** |
| --- | --- | --- | --- | --- | --- | --- |
| **IF staining** | | | | | | |
| 1 | GATA2 | RD | AF2046 | 1:200 | Goat | IF |
| 2 | GATA2 | Santa Cruz | sc-267 | 1:200 | Mouse | IF |
| 3 | GATA3 | RD | MAB6330 | 1:200 | Mouse | IF |
| 4 | POU5F1 | RD | AF1759 | 1:200 | Goat | IF |
| 5 | NANOG | Abcam | Ab21624 | 1:500 | Rabbit | IF |
| **CUT&Tag experiments** | | | | | | |
| 6 | GATA2 | Abcam | ab109241 |  | Rabbit | CUT&Tag |
| 7 | GATA3 | Abcam | ab124288 |  | Rabbit | CUT&Tag |
| 8 | H3K4me3 | Abcam | ab213224 |  | Rabbit | CUT&Tag |
| 9 | H3K27ac | Abcam | ab177178 |  | Rabbit | CUT&Tag |
| 10 | BRG1 | Abcam | ab110641 |  | Rabbit | CUT&Tag |
| 11 | Anti-Rabbit-IgG | Abcam | ab6702 |  | Goat | CUT&Tag |
| **FACS experiments** | | | | | | |
| 12 | PE-GATA2 | BioLegend | 614003 | 1:100 | Rat | FACS |
| 13 | 488-GATA3 | BioLegend | 653807 | 1:100 | Mouse | FACS |
| **WB experiments** | | | | | | |
| 14 | GAPDH | Invitrogen | AM4300 | 1:10000 | Mouse | WB |
| 15 | GATA2 | RD | AF2046 | 1:2000 | Goat | WB |
| 16 | GATA3 | RD | MAB6330 | 1:2000 | Mouse | WB |
| 17 | PAX6 | GeneTex | GTX113241 | 1:5000 | Rabbit | WB |
| 18 | KRT7 | CST | CST4465S | 1:5000 | Rabbit | WB |
| 19 | HRP-mouse | Invitrogen | 31430 | 1:5000 | Goat | WB |
| 20 | HRP-rabbit | Invitrogen | 31460 | 1:5000 | Goat | WB |
| 21 | HRP-goat | Invitrogen | 61-1620 | 1:5000 | Rabbit | WB |
| **Secondary antibodies** | | | | | | |
| 22 | Donkey anti-Mouse IgG, 488 | Invitrogen | A-21202 | 1:500 | Donkey |  |
| 23 | Donkey anti-Goat IgG, 488 | Invitrogen | A-11055 | 1:500 | Donkey |  |
| 24 | Goat anti-Rat IgG, 647 | Invitrogen | A-21247 | 1:500 | Goat |  |
| 25 | Donkey anti-Rabbit IgG, 488 | Invitrogen | A-21206 | 1:500 | Donkey |  |
| 26 | Goat anti-Rat IgG, 594 | Invitrogen | A-11007 | 1:500 | Goat |  |
| 27 | Donkey anti-Rabbit, 594 | Invitrogen | A-21207 | 1:500 | Donkey |  |
| 28 | Donkey anti-Goat IgG, 647 | Invitrogen | A-21447 | 1:500 | Donkey |  |
| 29 | Donkey anti-Rabbit IgG, 647 | Invitrogen | A-31573 | 1:500 | Donkey |  |
| 30 | Donkey anti-Mouse IgG, 647 | Invitrogen | A-31571 | 1:500 | Donkey |  |

**Table S2: Key resources table of primers of RT-qPCR**

| **No.** | **Oligo Name** | **Sequence (5′ --> 3′)** | **Purpose** |
| --- | --- | --- | --- |
| **1** | ENPEP-qF | GTCCGGAGGTGTTTCGAGTA | qPCR |
| **2** | ENPEP-qR | CGTTCTCCGTGTAGGTGGTT | qPCR |
| **3** | KRT8-qF | TGGAGCAGCAGAACAAGATG | qPCR |
| **4** | KRT8-qR | CCGCCTAAGGTTGTTGATGT | qPCR |
| **5** | GMC1-qF | GATGACAAGGAACCTGACCTAACC | qPCR |
| **6** | GMC1-qR | AAACAAGAGGCAAGGAGACCAC | qPCR |
| **7** | ACTB-qF | AGAAAATCTGGCACCACACC | qPCR |
| **8** | ACTB-qR | TAGCACAGCCTGGATAGCAA | qPCR |
| **9** | GAPDH-qF | ACATCGCTCAGACACCATG | qPCR |
| **10** | GAPDH-qR | TGTAGTTGAGGTCAATGAAGGG | qPCR |
| **11** | CGA-qF | CATTGTCGGTGTTTCTGCATG | qPCR |
| **12** | CGA-qR | TGGGTTTTCCTGTAGCGTG | qPCR |
| **13** | CGB-qF | CTGGCTGTGGAGAAGGAG | qPCR |
| **14** | CGB-qR | ACATCGCGGTAGTTGCAC | qPCR |
| **15** | POU5F1-qF | CCTCACTTCACTGCACTGTA | qPCR |
| **16** | POU5F1-qR | CAGGTTTTCTTTCCCTAGCT | qPCR |
| **17** | NANOG-qF | TGAACCTCAGCTACAAACAG | qPCR |
| **18** | NANOG-qR | TGGTGGTAGGAAGAGTAAAG | qPCR |
| **19** | SOX2-qF | CCATGCAGGTTGACACCGTTG | qPCR |
| **20** | SOX2-qR | TCGGCAGACTGATTCAAATAATACAG | qPCR |
| **21** | hEOMES-qF | CGCCACCAAACTGAGATGAT | qPCR |
| **22** | hEOMES-qR | CACATTGTAGTGGGCAGTGG | qPCR |
| **23** | hGATA6-qF | TGTGCAATGCTTGTGGACTC | qPCR |
| **24** | hGATA6-qR | GCTGTAGGTTGTGTTGTGGG | qPCR |
| **25** | hGATA4-qF | GGAAGCCCAAGAACCTGAAT | qPCR |
| **26** | hGATA4-qR | GTTGCTGGAGTTGCTGGAA | qPCR |
| **27** | hT (BRACHYURY)-qF | TATGAGCCTCGAATCCACATAGT | qPCR |
| **28** | hT (BRACHYURY)-qR | CCTCGTTCTGATAAGCAGTCAC | qPCR |
| **29** | hSOX17-qF | GAGCCAAGGGCGAGTCCCGTA | qPCR |
| **30** | hSOX17-qR | CCTTCCACGACTTGCCCAGCAT | qPCR |
| **31** | hPAX6-qF | ATGTGTGAGTAAAATTCTGGGCA | qPCR |
| **32** | hPAX6-qR | GCTTACAACTTCTGGAGTCGCTA | qPCR |
| **33** | hNES-qF | GAAGGGCAATCACAACAGGTG | qPCR |
| **34** | hNES-qR | GGGGCCACATCATCTTCCA | qPCR |
| **35** | hGATA2-qF | GAACCGACCACTCATCAAGC | qPCR |
| **36** | hGATA2-qR | TTCTTCATGGTCAGTGGCCT | qPCR |
| **37** | hGATA3-qF | TGCAGGAGCAGTATCATGAAGCCT | qPCR |
| **38** | hGATA3-qR | GCATCAAACAACTGTGGCCAGTGA | qPCR |
| **39** | TFAP2C-qF | CTGTTGCTGCACGATCAGACA | qPCR |
| **40** | TFAP2C-qR | CTCAGTGGGGTTCATTACGGC | qPCR |
| **41** | hHAND1-qF | CCAAGGATGCACAGTCTGG | qPCR |
| **42** | hHAND1-qR | AGGAGGAAAACCTTCGTGCTG | qPCR |
| **43** | hKRT7-qF | AGGATGTGGATGCTGCCTAC | qPCR |
| **44** | hKRT7-qR | CACCACAGATGTGTCGGAGA | qPCR |
| **45** | TBX3-qF | GAGGCTAAAGAACTTTGGGATCA | qPCR |
| **46** | TBX3-qR | CATTTCGGGGTCGGCCTTA | qPCR |
| **47** | hISL1-qF | AGGAGCAACTGGTAGAGATGAC | qPCR |
| **48** | hISL1-qR | GTCCTTGCACCGCTTGTTTTG | qPCR |
| **49** | GABRP-qF | TTTCTCAGGCCCAATTTTGGT | qPCR |
| **50** | GABRP-qR | GCTGTCGGAGGTATATGGTGG | qPCR |
| **51** | VTCN1-qF | TCTGGGCATCCCAAGTTGAC | qPCR |
| **52** | VTCN1-qR | TCCGCCTTTTGATCTCCGATT | qPCR |
| **53** | MUC16-qF | CCAGTCCTACATCTTCGGTTGT | qPCR |
| **54** | MUC16-qR | AGGGTAGTTCCTAGAGGGAGTT | qPCR |

**Table S3: Key resources table sgRNA oligos**

| **Gene** | **Oligo Name** | **(sgRNA) Sequence (5′ --> 3′) (BbsI)** |
| --- | --- | --- |
| **GATA2-DKO** | GATA2-sgRNA-up-F | caccgAGACCCTGAGCCGCCGCCGC |
| GATA2-sgRNA-up-R | aaacGCGGCGGCGGCTCAGGGTCTc |
| **GATA2-DKO** | GATA2-sgRNA-down-F | caccgGCTCGTTCCTGTTCAGGTAA |
|  | GATA2-sgRNA-down-R | aaacTTACCTGAACAGGAACGAGCc |
| **GATA3-DKO** | GATA3-sgRNA-up-F | caccgGGCCTCGTCCTCCTCCTTGT |
|  | GATA3-sgRNA-up-R | aaacACAAGGAGGAGGACGAGGCCc |
| **GATA3-DKO** | GATA3-sgRNA-down-F | caccgCCGGCTTCGGATGCAAGTCC |
|  | GATA3-sgRNA-down-R | aaacGGACTTGCATCCGAAGCCGGc |

**Table S4: Summary of Primers for cell genotyping**

| **No.** | **Oligo Name** | **Sequence (5′ --> 3′)** | **Purpose** |
| --- | --- | --- | --- |
| **1** | GATA2-DKO-GF | CGGGACTGGTGCTCTTTCTC | genotyping |
| **2** | GATA2-DKO-GR | GGTCTCAAACATCTGCTGGG | genotyping |
| **3** | GATA3-DKO-GF | CCGATGCGAGGTAGAGAT | genotyping |
| **4** | GATA3-DKO-GR | GGGAGGAGGGAGGAGAAAA | genotyping |

**Table S5: Key resources table vectors**

| **Purpose** | **Vector** | **Supplier & Cat. No.** |
| --- | --- | --- |
| **General cloning** | PMD18-T cloning vectors | TAKARA, #6011 |
|  | PB-EF1a-TetOn3G | Addgene, #104543 |
| **Genetic knockout** | pKLV2_U6sgRNA | Addgene, #67974 |
|  | pKLV2-EF1a-BsdCas9-W | Addgene, #67978 |
|  | pSpCas9(BB)-2A-GFP (PX458) | Addgene, #48138 |
|  | pSpCas9(BB)-2A-Puro (PX459) V2.0 | Addgene, #62988 |
